1 ***Pyricularia* Populations are Mostly Host-Specialized with Limited Reciprocal Cross-**  
2 **Infection Between Wheat and Endemic Grasses in Minas Gerais, Brazil**

3  
4 João P. Ascari<sup>1</sup>, Luis I. Cazón<sup>1</sup>, Mostafa Rahnama<sup>2,5</sup>, Kurt Lamour<sup>3</sup>, José M. C. Fernandes<sup>4</sup>,  
5 Mark L. Farman<sup>2\*</sup>, Emerson M. Del Ponte<sup>1\*</sup>

6  
7 <sup>1</sup> Departamento de Fitopatologia, Universidade Federal de Viçosa, Viçosa, MG 36570-900 Brazil

8 <sup>2</sup> Department of Plant Pathology, University of Kentucky, Lexington, KY 40546, USA

9 <sup>3</sup> Department of Entomology and Plant Pathology, University of Tennessee, Knoxville, TN, 37996, USA

10 <sup>4</sup> Embrapa Trigo, Passo Fundo, RS, 99050-970 Brazil

11 <sup>5</sup> Department of Biology, Tennessee Tech University, TN, 38501, USA

12  
13 \* Corresponding authors:

14 Emerson M. Del Ponte; [delponte@ufv.br](mailto:delponte@ufv.br) and Mark L Farman; [mark.farman@uky.edu](mailto:mark.farman@uky.edu)

15  
16  
17 **Abstract**

18 Wheat blast, caused by *Pyricularia oryzae* Triticum (PoT), is an emergent threat to wheat  
19 production. Current understanding of the evolution and population biology of the pathogen and  
20 epidemiology of the disease has been based on phylogenomic studies that compared the wheat  
21 blast pathogen with isolates collected from grasses that were invasive to Brazilian wheat fields.  
22 Genetic similarity between isolates from wheat and grasses lead to the conclusion that  
23 significant cross-infection occurs, especially on signalgrass (*Urochloa spp.*); and this in turn  
24 prompted speculation that its widespread use as forage is a key driver of the disease's  
25 epidemiology. We reanalyzed data from those studies and found that all but one of the isolates  
26 from non-wheat hosts were members of PoT and the related *Lolium*-adapted lineage (PoL1),  
27 which meant that the *Pyricularia* populations typically found on endemic grasses had not yet  
28 been sampled. To address this shortcoming, we performed a comprehensive sampling of blast  
29 lesions in wheat crops and endemic grasses found in and away from wheat fields in Minas  
30 Gerais. A total 1,368 diseased samples were collected (976 leaves of wheat and grasses and  
31 392 wheat heads) which yielded a working collection of 564 *Pyricularia* isolates. We show  
32 that, contrary to earlier implications, PoT was rarely found on endemic grasses and, conversely,  
33 members of grass-adapted populations were rarely found on wheat. Instead, most populations  
34 were host-specialized with constituent isolates usually grouping according to their host-of-  
35 origin. With regard to the dominant role proposed for signalgrass in wheat blast epidemiology,  
36 we found only one PoT member in 67 isolates collected from signalgrass grown away from

37 wheat fields, and only three members of *Urochloa*-adapted populations among hundreds of  
38 isolates from wheat. Cross-inoculation assays on wheat and a signalgrass used in pastures (*U.*  
39 *brizantha*) suggested that the limited cross-infection observed in the field may be due to innate  
40 compatibility differences. Whether or not the observed level of cross-infection would be  
41 sufficient to provide an inoculum reservoir, or serve as a bridge between wheat growing  
42 regions, is questionable and, therefore, deserves further investigation.

43

44

45

## Introduction

46

47 The ascomycete *Pyricularia oryzae*, one of the most studied and economically important  
48 fungal plant pathogens worldwide (Dean et al. 2012), is the cause of diseases in commercial  
49 crops including rice blast (Valent and Chumley, 1991), wheat blast (Couch and Kohn, 2002)  
50 and gray leaf spot in annual and perennial ryegrasses (Farman, 2002). The disease is a current  
51 threat to the cultivation of wheat on three continents: South America, Asia, and Africa. First  
52 reported in 1985 in the state of Paraná, Brazil (Igarashi et al. 1986), wheat blast spread to all  
53 major Brazilian wheat-producing regions (Ceresini et al. 2018; Goulart et al. 1990), and to  
54 neighboring countries including Paraguay, Bolivia, and Argentina (Barea and Toledo, 1996;  
55 Cabrera and Gutierrez, 2007; Casal-Martínez et al. 2021). International attention has been  
56 raised after the discovery of wheat blast in Bangladesh, south Asia (Malaker et al. 2016) and,  
57 more recently, in Zambia, Eastern Africa (Tembo et al. 2020).

58 Wheat blast epidemics occur more frequently in the tropics where significant yield losses  
59 have been associated more often with symptoms on the heads than on the leaves (Cruz and  
60 Valent, 2017). In fact, leaf blast sporadically occurs in Brazilian wheat fields when warm and  
61 wet weather during the early season might favor infection and inoculum build-up on young  
62 leaves (Cruz et al. 2015). The first detailed report of yield losses due to wheat blast was  
63 estimated at around 27% in Brazil (Goulart et al. 1990), but greater losses, nearing 100%, have  
64 also been reported (Coelho et al. 2016; Dianese et al. 2021; Santos et al. 2022; Goulart and  
65 Paiva, 2000; Trindade et al. 2006). In the first major epidemics in Bangladesh, in 2016, the  
66 disease caused losses in more than 15,000 ha, which resulted in complete destruction of some  
67 affected fields (Islam et al. 2016; Malaker et al. 2016).

68 *P. oryzae* is a species comprising more than 30 sub-populations that are delimited primarily  
69 based on host affinity, although there is evidence that significant gene flow and admixture has  
70 occurred amongst them (Gladieux et al. 2018; Valent et al. 2019). These sub-populations, also  
71 known as pathotypes (Ou, 1980), or lineages (phylogenetically distinct groups) (Talbot et al.  
72 1993), are normally specialized on one particular host (Gladieux et al. 2018), with some  
73 exhibiting fairly strict host-specificity with almost no evidence of cross-infection in nature.  
74 These include the lineages found on *Oryza* (*P. oryzae* *Oryza*, PoO), *Setaria* (PoS),  
75 *Stenotaphrum* (PoSt), and *Eleusine* (PoE) (Gladieux et al. 2018; Latorre et al. 2020). On the  
76 other hand, the *Triticum*-specialized lineage (PoT), and the related *Lolium* pathogens (PoL1),  
77 among others, should be more accurately defined as host-specialized because, although these  
78 are mostly found in association with their eponymous hosts, they can also be found on other  
79 Poaceae species (Kato et al. 2000; Tosa et al. 2004; Tosa and Chuma, 2014; Urashima et al.  
80 1993). The ability of the wheat blast pathogen to infect additional cereal crops, as well as forage  
81 and turf grasses, is important when thinking about disease development and epidemic spread.  
82 This is because alternative hosts often occur in proximity to wheat fields and may occupy large  
83 geographical areas, either due to their invasive nature, or their widespread use as forage.

84 There have been some studies on the population structure and genetic diversity of wheat  
85 blast in Brazil and its relationship to isolates found on surrounding grasses (Castroagudín et  
86 al. 2017; Castroagudín et al. 2016; Maciel et al. 2014, 2023). In 2012, Ceresini and coworkers  
87 collected a large number of wheat blast isolates from more than ten locations in seven states of  
88 Brazil. At the same time, they sampled *P. oryzae* from grasses bordering the wheat fields, as  
89 well as isolates from rice production areas (Castroagudín et al. 2016). These studies revealed a  
90 strong phylogenetic relationship between isolates from wheat and certain grasses, and a distinct  
91 separation from PoO, which led to the proposition of a new species, *Pyricularia graminis tritici*  
92 (Pygt) (Castroagudín et al. 2016). Subsequent studies implied there was significant evidence  
93 of gene flow between the wheat blast and grass-infecting isolates (Castroagudín et al. 2017),  
94 prompting speculation that wheat blast undergoes mating on endemic grass species, thereby  
95 increasing genetic diversity within the blast population (Ceresini et al. 2018, 2019). Lastly, it  
96 was suggested that isolates causing wheat blast showed a particularly close taxonomic affinity  
97 with isolates from signalgrass (*Urochloa* spp.) - a widely grown forage crop in Brazil -  
98 promoting the hypotheses that wheat blast evolved via a host jump from *Urochloa*  
99 (Stukenbrock and McDonald, 2008); and that *Urochloa* serves as a key inoculum reservoir,

100 and a “bridge” facilitating gene flow between separate wheat growing regions (Ceresini et al.  
101 2018, 2019).

102 However, as noted in the accompanying paper (Farman et al. 2022), when the fungal isolates  
103 used by Ceresini and colleagues were analyzed in a broader phylogenetic framework, this  
104 revealed that the foregoing studies had not actually sampled the endemic grass-infecting  
105 populations because the isolates from grasses were PoT and PoL1 lineage members - probably  
106 from opportunistic infections on grasses invasive to wheat crops. Moreover, a preliminary  
107 survey based on genome sequencing of a sample of grass-infecting isolates collected at varying  
108 distances away from wheat fields suggested that PoT is rarely found on endemic grasses. This  
109 latter finding motivated the present study where we sought to characterize the endemic grass-  
110 infecting populations in the Cerrado region of Minas Gerais (MG) state with the specific goals  
111 of testing the following hypotheses: 1) Infection of endemic grasses, and especially signalgrass,  
112 by the wheat-infecting (PoT) lineage is mostly restricted to plants in and around wheat fields,  
113 where wheat blast inoculum densities are highest; 2) fungal isolates that typically infect native  
114 grasses are rarely found on wheat; and 3) signalgrass/wheat does not support effective  
115 colonization of plant tissue by PoT/non-PoT lineage members. To test these hypotheses, we  
116 comprehensively sampled *P. oryzae* from wheat fields and from grasses growing at varying  
117 distances from wheat-growing locations. PCR assays and genotyping-by-sequencing were then  
118 performed to identify isolates down to species and lineage levels, thereby providing an accurate  
119 insight into the relationship between fungal populations infecting wheat and grasses. A  
120 particular focus was placed on populations infecting signalgrass to re-evaluate the hypothesis  
121 that they play a major role in wheat blast epidemiology.

122

123

## Materials and Methods

### 124 Study area and sampling

125 Surveys were conducted in wheat-growing regions and natural landscapes of MG state during  
126 the 2018 and 2019 growing seasons. While wheat blast was found only on the heads of wheat  
127 crops in 2018 (n = 4 wheat fields), it occurred both on leaves and heads of wheat in 2019 (n =  
128 11 wheat fields). The sampling target and design varied according to the timing of sampling  
129 and whether the site was a wheat or non-wheat area (Fig. 1). The pre-season sampling in mid-  
130 February (summer season in MG) targeted grass weed hosts which were collected randomly



131 by visiting natural landscapes along roadsides and in off-season wheat areas (Fig. S1). Each  
132 sample comprised five to ten leaves, which were placed into paper bags and placed at room  
133 temperature ( $23^{\circ}\text{C} \pm 4^{\circ}\text{C}$ ) to dry for one week before being stored at  $10^{\circ}\text{C}$ . Mid-season  
134 sampling in mid to late May (Fall season) focused on collecting: a) blast-symptomatic leaves  
135 (only in 2019) and heads (2018 and 2019) in wheat fields and b) blast-symptomatic leaves of  
136 grass weeds either within or near to wheat growing areas. For the wheat blast samples, five to  
137 10 (depending on field size) 50-m transects placed 200 m apart were randomly defined. At least  
138 one sample (five to ten leaves or five heads) was collected at each transect, similar to a previous  
139 study (Maciel et al. 2014). Weed species were identified morphologically based on the  
140 literature (taxonomic guides) (Lorenzi, 2014). The wheat varieties could not be identified. All  
141 natural landscapes, wheat commercial fields, and individual plants in the field were  
142 photographed using a smartphone camera (72 dpi resolution). In the laboratory, photographs  
143 of the symptoms, on leaves or heads (in the case of wheat), were obtained using a smartphone  
144 camera and a digital magnifying miniscope (10X, 96 dpi resolution) (Fig. 2S).

145

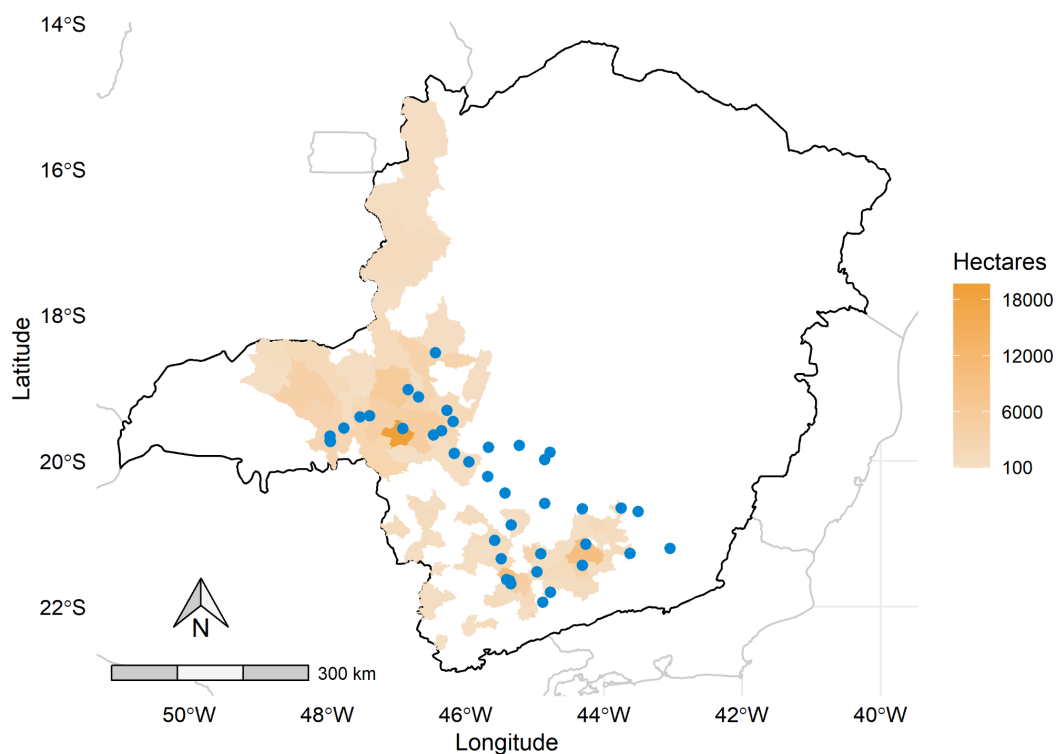

146

147 **Fig. 1.** Map of Minas Gerais (MG) state, Brazil, depicting wheat area (in hectares) planted per municipality (color  
148 gradient) and the locations of the sampling sites where blast-symptomatic Poaceae (wheat and grasses) were  
149 collected (dots). Source: (IBGE, 2017).

150

## 151 **Culturing, purification and storage**

152 Wheat heads (one per sample) and leaves (five per sample) of wheat or grass weeds, were  
153 cut into small pieces and placed within a 9 cm-plastic dish filled with moistened filter paper,  
154 and incubated for 24 h at 25°C ±5 under a 12/12 h photoperiod (light/darkness) to induce  
155 sporulation (Urashima et al. 2017). Under the stereomicroscope light, conidiophores and  
156 associated sparkling crystal-clear spore mass on leaf and head-rachis could be visualized. A  
157 sterilized sealed Pasteur pipette was scraped over the sporulating mass and streaked across the  
158 water agar supplemented with chloramphenicol and streptomycin, each at 100 µg/ml. Plates  
159 were incubated at 25±5°C for 24 h (12/12 h fluorescent light/darkness) (Farman et al. 2017;  
160 Gupta et al. 2020). For each culture, a single bisepate, pyriform conidium (Klaubauf et al.  
161 2014; Murata et al. 2014) with a visible germ tube was transferred to oatmeal agar (OA) (30 g  
162 oats, 20 g agar, 1 L distilled water), and pieces of sterilized filter paper (10 mm x 0.4 mm) were  
163 placed nearby. The dishes were incubated as above for 7 d until the mycelium fully covered  
164 the filter paper. The papers were then transferred to a new Petri plate filled with blue silica  
165 crystals and left to dry at room temperature (25°C±5) for 5 d. Dried paper pieces were  
166 transferred to a 2 ml-microtube half-filled with fresh sterile blue silica and stored in a -10°C  
167 freezer (Farman et al. 2017; Farman, 2002; Gupta et al. 2020). Isolates were stored in duplicates  
168 as a backup of the entire collection.

## 169 **Growth of *Pyricularia* spp. and DNA extraction**

170 A single filter paper of each isolate was placed on a potato dextrose agar and incubated at  
171 25±5°C under 12/12 h photoperiod (fluorescent light/darkness). A 6 mm mycelial block from  
172 a 5-day-old colony was then transferred to a 50 mL falcon tube filled with 20 mL of liquid  
173 complete medium (6 g casamino-acids, 6 g yeast extract, and 10 g sucrose per 1 liter). The  
174 tubes were shaken for 7 days at 150 rpm under room temperature (23-26°C) and ambient light.  
175 The mycelium was recovered through two layers of cheesecloth and let to dry at an ambient  
176 temperature for 3 h, and freeze-dried in 2 mL microtubes for 24 h (M. Farman et al. 2017;  
177 Urashima et al. 2017) using a CoolSafe Freeze Dryer (SCANVAC). The mycelium ball was  
178 manually crushed against the microtube wall until it formed a powder, which was then  
179 resuspended in 1 mL lysis buffer (100 mM Tris-HCl, pH8; 0.5 M NaCl, 10 mM EDTA; 1 %  
180 SDS) and heated 65°C for 30 min. Adding 700 µl phenol:chloroform:isoamyl alcohol (25:24:1)  
181 and heated 65°C for 30 min. Subsequently, centrifuged at 14000 rpm for 15 min, and carefully  
182 transferred 0.8 µl of aqueous phase to a new identified microtube, where was added 450 µl of

183 cool isopropanol and centrifuged at 14,000 rpm for 10 min to pellet the DNA. The supernatant  
184 was carefully discarded and the pellet was washed with 1 mL of 70% ethanol, and re-pelleted  
185 by centrifuging for 5 min at 14,000 rpm. The supernatant was discarded and the DNA was  
186 dried at room temperature for 60 min, redissolved in 100  $\mu$ l TE + 2  $\mu$ l RNase A (1  $\mu$ g/ml), and  
187 stored at 4°C overnight, before being placed in the -20°C freezer (Farman et al. 2017). The  
188 DNA concentration was estimated using a spectrophotometer NanoDrop 2000 (Thermo  
189 Scientific™) and adjusted to 100 ng/ $\mu$ l using TE buffer.

#### 190 **PCR assays targeting *P. oryzae***

191 The entire collection of 572 isolates was first screened by using PCR to amplify the CH7-  
192 BAC9 locus, which is present in *P. oryzae* (Po) but absent in other *Pyricularia* (non-Po),  
193 including *P. grisea*, *P. pennisetigena*, or *P. urashimae* (Couch et al. 2005). The assays were  
194 performed using 1  $\mu$ l of genomic DNA (100 ng/ $\mu$ l) and primer concentrations of 10  $\mu$ M, with  
195 the GoTaq® Colorless Master Mix, according to the manufacturer's specifications (Promega).  
196 Reactions were carried out in a MyGene™ thermal cycler (Model MG96G), with the following  
197 parameters: an initial denaturation at 95° for 8 min, followed by 35 cycles of 95°C for 15 sec,  
198 55°C for 20 sec, 72°C for 60 sec, and a final extension at 72°C for 5 min (Couch et al. 2005).  
199 To confirm the accuracy of CH7-BAC9 for discriminating Po from non-Po, the MPG1 locus  
200 was amplified and sequenced for all negatives and select positive ones. The sequence of this  
201 gene was used in phylogeny analysis to identify *Pyricularia* at the species level (Couch et al.  
202 2005). PCR assays were performed with 1  $\mu$ l of genomic DNA (100 ng/ $\mu$ l) using the same  
203 GoTaq® Mix and thermal cycler. Amplification conditions for MPG1 were as follows: initial  
204 denaturation at 95° for 8 min, followed by 35 cycles of 95°C for 15 sec, 55°C for 20 sec, 72°C  
205 for 60 sec, and a final extension at 72°C for 5 min (Couch et al. 2005). PCR products were  
206 sequenced.

#### 207 **PCR assays targeting *P. oryzae* Triticum pathotype**

208 To distinguish *P. oryzae* Triticum lineage members (PoT) from non-PoT, we used the MoT3  
209 primer set (F: GTCGTCATCAACGTGACCAG; R: ACTTGACCCAAGCCTCGAAT) that yields a  
210 362 bp amplicon (Pieck et al. 2017). For C17 diagnostics (Thierry et al. 2020), we designed a  
211 new primer set for a modified (standard PCR) assay that identifies PoT based on the positive  
212 amplification of a 500 bp fragment (F: GAGGAAGATCAAGTAAGTGG; R:  
213 GGTAGATGTCATGATTTAC). Here, it is important to note that while these two loci were  
214 selected for the specific purpose of identifying PoT (MoT), neither is truly diagnostic because

215 both loci were contributed to the PoT lineage via admixture (Rahnama et al. 2021). MoT3 was  
216 donated by a *Urochloa* pathogen from the PoU3 (subgroup of PoSt) lineage and, therefore,  
217 tests positive with certain isolates from *Urochloa*. Likewise, C17 was contributed to PoT by a  
218 lineage that is related to rice pathogens, but has not yet been sampled from the field (“PoX”).  
219 For this reason, tentative lineage designations were made according to a specific schema (Table  
220 1) and, where necessary, sequencing of the CH7-BAC9 and MPG1 loci, and genotyping by  
221 sequencing were performed to validate the assignments.

222

223 TABLE 1. Identification of *P. oryzae*/*P. urashimae* lineages based on MoT3/C17 test results

| lineage                                    | MoT3 | C17 |
|--------------------------------------------|------|-----|
| PoT                                        | +    | +   |
| PoU3, Pu <sup>a</sup> , (PoT) <sup>b</sup> | +    | -   |
| PoT, PoX <sup>c</sup>                      | -    | +   |
| PoL, PoM, others <sup>d</sup>              | -    | -   |

224 <sup>a</sup> *Pyricularia urashimae*

225 <sup>b</sup> Eventual detection of PoT (*Pyricularia oryzae* *Triticum* lineage) members with this pattern is predicted

226 <sup>c</sup> Definitive identification of the lineage requires sequencing of additional loci

227 <sup>d</sup> Definitive identification of the lineage requires sequencing of additional loci or genome sequencing

228

229

230 Assays were performed using 10 ng template and the same GoTaq® mix. Cycling conditions  
231 were as follows: MoT - initial denaturation at 95°C for 8 min, followed by 35 cycles of 95°C  
232 for 15 sec, 55°C for 20 sec, 72°C for 60 sec, and a final extension at 72°C for 5 min; C17 -  
233 initial denaturation at 94°C for 2 min, 35 cycles of 95°C for 10 sec, 54°C for 30 sec, 72°C for  
234 30 sec, and a final extension at 72°C for 5 min. PCR products were fractionated by  
235 electrophoresis in a 1%-agarose gel for 100 min at 80 Volts, 100 mA, and 80 watts, using a 1  
236 Kb DNA ladder (Cellco®). The DNA was stained with GelRed® and the gel was visualized  
237 and photographed under ultraviolet (UV) light.

### 238 Lineage assignment

239 Consensus lineage assignments were made using different criteria and took into account  
240 the host-of-origin, established patterns of sequence distribution among the different host-  
241 specialized lineages, as well as known population structure. For example, if an isolate came  
242 from a host that typically harbors one or more specific lineages, and those lineages have not  
243 yet shown any evidence of admixture, sequence data for a single marker allowed a confident

244 assignment. For others - especially isolates from lineages with higher than normal cross-  
245 infection behavior, or known admixture - multi-locus genotyping was necessary.

## 246 **Cross-inoculation assays**

247 A subcollection of 20 strains isolated from wheat ( $n = 11$ , being all PoT) or signalgrass ( $n =$   
248 9, being six non-PoT [three PoU and two Pu] and three PoT) was studied with regards to  
249 aggressiveness towards leaves and heads of two wheat cultivars (BR 18-Terena and BRS  
250 Guamirim) and leaves of one *Urochloa brizantha* cultivar (cv. Marandu) (Table 2). Among the  
251 PoT isolates, a reference isolate (16MoT001), used as standard for aggressiveness in screening  
252 for host resistance (Cruppe et al. 2020), was included for comparison. The inoculations on the  
253 leaves were conducted on 35-day-old plants exhibiting three to four completely expanded  
254 leaves, growth stage 15 (Zadoks et al. 1974). Inoculations on the heads were performed in 60-  
255 day-old plants at early anthesis, growth stage 60 (Zadoks et al. 1974). Each experiment  
256 (inoculation on leaves or heads) was conducted twice under greenhouse conditions between  
257 March and September 2020.

258 *Inoculum production.* For each isolate, a piece of filter paper containing the fungus was  
259 removed from the  $-10^{\circ}\text{C}$  storage and re-activated on Potato Dextrose Agar (PDA). A 5-day-  
260 old mycelial plug was transferred to oatmeal-agar (OA) (replicated in five 9 cm-dishes per  
261 isolate). The fungus was cultured for seven days. To induce fungal sporulation, plates were  
262 scraped out using a Drigalski spatula and 5 ml of sterilized-distilled water. The dishes were  
263 incubated for a further seven days. Spores were harvested by adding 10 ml of distilled-sterilized  
264 water amended with 0.01% Tween-20, and carefully scraped using a Drigalski spatula. Spore  
265 suspension was filtered through two layers of cheesecloth. Spore concentration was adjusted  
266 to  $1 \times 10^5$  spores/mL using a Neubauer counting chamber. PDA and OA dishes were both  
267 supplemented with chloramphenicol and streptomycin at  $100 \mu\text{g/ml}$ . Incubation was performed  
268 in a grown chamber with controlled temperature of  $25^{\circ}\text{C} (\pm 2^{\circ})$ , and photoperiod of 12/12 hours  
269 (fluorescent light/darkness) (Cruz et al. 2016; Urashima et al. 2017).

270 *Plant growth conditions.* The plants were sown in 2-L plastic pots filled with substrate  
271 (Tropstrato - Vida Verde) which was a mixture of pine bark, peat, and expanded vermiculite.  
272 Basal fertilization was performed with monoammonium phosphate (12% N and 50%  $\text{P}_2\text{O}_5$ ).  
273 The number of plants per pot was reduced to eight and ten for wheat and signalgrass,  
274 respectively. Plants were kept in the greenhouse under controlled environmental conditions  
275 ( $\pm 11$  hour of light and  $25^{\circ}\text{C} \pm 4^{\circ}\text{C}$ ) and watered daily until inoculation time.

276 TABLE 2. Information for isolates obtained from wheat blast (PoT = 14 isolates) or signalgrass  
 277 blast (PoT = 3; non-PoT = 6; species/lineage as designated) used in replicated cross-  
 278 inoculation experiments.  
 279

| Host of Origin            | Municipality           | Collection date | Code <sup>b</sup> | ID <sup>c</sup> |
|---------------------------|------------------------|-----------------|-------------------|-----------------|
| <i>Urochloa brizantha</i> | Patos de Minas         | Feb. 2018       | 108               | PoU3            |
| <i>U. brizantha</i>       | Patos de Minas         | Feb. 2018       | 110               | PoU3            |
| <i>U. brizantha</i>       | Patos de Minas         | Feb. 2018       | 112               | PoU3            |
| <i>U. brizantha</i>       | Uberaba                | May 2018        | 166               | PoU4            |
| <i>U. brizantha</i>       | Formiga                | Feb. 2019       | 209               | Pu              |
| <i>U. brizantha</i>       | Catas Altas da Noruega | Feb. 2019       | 656               | Pu              |
| <i>U. brizantha</i>       | Madre de Deus          | May 2019        | 742               | PoT             |
| <i>U. brizantha</i>       | Madre de Deus          | May 2019        | 758               | PoT             |
| <i>U. humidicola</i>      | São Gonçalo do Pará    | Feb. 2019       | 213               | PoT             |
| <i>Triticum aestivum</i>  | Patos de Minas         | May 2018        | 167               | PoT             |
| <i>T. aestivum</i>        | Ibiá                   | May 2019        | 238               | PoT             |
| <i>T. aestivum</i>        | Ibiá                   | May 2019        | 239               | PoT             |
| <i>T. aestivum</i>        | Uberaba                | May 2019        | 367               | PoT             |
| <i>T. aestivum</i>        | Santa Juliana          | May 2019        | 375               | PoT             |
| <i>T. aestivum</i>        | Patrocínio             | May 2019        | 376               | PoT             |
| <i>T. aestivum</i>        | Boa Esperança          | May 2019        | 309               | PoT             |
| <i>T. aestivum</i>        | Boa Esperança          | May 2019        | 311               | PoT             |
| <i>T. aestivum</i>        | Madre de Deus          | May 2019        | 604               | PoT             |
| <i>T. aestivum</i>        | Boa Esperança          | May 2019        | 813               | PoT             |
| <i>T. aestivum</i>        | Passo Fundo, RS        | 2019            | MoT01             | PoT             |

280 <sup>a</sup> Sampling distance from wheat areas. Within (in-field); Nearby (< 1 km) and Away (> 50km).

281 <sup>b</sup> Prefix UFVPY

282 <sup>c</sup> The separation between PoT and non-PoT isolates was performed using MoT3 and C17 primers in a PCR assay.  
 283 The non-PoT lineages were identified based on genotyping by sequencing data. PoU = *Pyricularia oryzae* lineage  
 284 *Urochloa*; and Pu = *Pyricularia urashimae*  
 285



286 Side-dressing fertilization were conducted weekly adding to each pot 30ml of nutritive  
287 solution prepared with 6.4mg/L KCl, 3.48mg/L K<sub>2</sub>SO<sub>4</sub>, 5.01mg/L MgSO<sub>4</sub>·7H<sub>2</sub>O, 2.03mg/L  
288 (NH<sub>2</sub>)<sub>2</sub>CO, 0.009mg/L NH<sub>4</sub>MO<sub>7</sub>O<sub>24</sub>·4H<sub>2</sub>O, 0.054mg/L H<sub>3</sub>BO<sub>3</sub>, 0.222mg/L ZnSO<sub>4</sub>·7H<sub>2</sub>O,  
289 0.058mg/L CuSO<sub>4</sub>·5H<sub>2</sub>O, 0.137mg/L MnCl<sub>2</sub>·4H<sub>2</sub>O, 0.27g/L FeSO<sub>4</sub>·7H<sub>2</sub>O and 0.37g/L  
290 disodium-EDTA prepared with distilled water (Xavier Filha et al. 2011).

291 *Inoculation procedures.* Plants (leaves or heads) on each pot were sprayed-inoculated (15  
292 mL) with the spore suspension using a 0.5L manual plastic sprayer (Guarany® - Gifor). The  
293 plants were placed in the dark within a chamber adjusted to 25°C (±2%) and humidity >90%  
294 during 20 hours. The potted plants were moved to a growth chamber with controlled  
295 temperature at 28°C (±2°), humidity >80%, and 12/12 hours of fluorescent light/darkness  
296 during seven days, until performing the disease assessments.

297 *Disease assessment and data analysis.* The assessment of leaf blast severity (percentage  
298 area affected) in wheat and signalgrass, and severity on wheat heads (percent of spikelets with  
299 symptoms), was conducted seven days post-inoculation (dpi). Severity on the leaves was  
300 measured on ten leaves randomly selected from each pot. These were removed from the plant  
301 and imaged against a white background, using a flatbed scanner (HP - LaserJet M1132 MFP)  
302 at 600-dpi resolution and JPEG file format. Images were analyzed in ImageJ (Schneider et al.  
303 2012) to threshold the symptomatic and asymptomatic area, and then calculate severity (%  
304 symptomatic area). The severity on wheat heads was assessed visually. The means and 95%  
305 confidence interval of the percent severity of leaf and head blast were estimated for each isolate  
306 after pooling data from two replicates of the experiment.

307

### 308 **Data and code availability**

309 Data and custom R codes (R Core Team 2022) used for data analyses are available at  
310 <https://github.com/emdelponte/paper-wheat-blast-MG>

311

312

313

## **Results**

### 314 **Recovery of *Pyricularia* from blast-like lesions**

315 A large collection of isolates from wheat and grasses, both nearby and away (dozens to  
316 hundreds of km) from wheat crops, were obtained during the two-year, multi-location, survey  
317 conducted across the state of MG. A total of four surveys were conducted - prior to and during  
318 the wheat growing seasons - in 2018 and 2019, which experienced typical and severe wheat

319 blast outbreaks, respectively. Poaceae with blast-like symptoms (diamond-shaped lesions)  
320 were sampled during the visits, but with a focus on signalgrass (*Urochloa* spp.) growing near  
321 to wheat fields, and in natural landscapes farther away. A total of 1,368 diseased samples were  
322 collected (976 for leaves and 392 for wheat heads) from 20 Poaceae genera (31 species) (Table  
323 3). Symptomatic plants collected at the non-wheat regions comprised mostly weeds and  
324 included *Cenchrus*, *Cynodon*, *Digitaria*, *Eleusine*, *Hordeum*, *Melinis*, and *Panicum*. Symptoms  
325 were found on six species of signalgrass (*U. brizantha*, *U. humidicola*, *U. plantaginea*, *U.*  
326 *ruziziensis*, *U. arrecta*, *U. decumbens*), with *U. brizantha* being the most prevalent. In total,  
327 pure cultures that were morphologically similar to *Pyricularia* spp. were successfully  
328 recovered from approximately 68% of samples, resulting in a total of 932 monoconidial isolates  
329 (Table 3).

### 330 **PCR-based diagnostics identified minimal cross-infection between isolates adapted to** 331 **wheat versus endemic grasses**

332 A subcollection of 564 isolates (including all of those from endemic grasses) were pre-  
333 screened using CH7BAC9 PCR (Supplementary Table S1) which yields positive amplification  
334 for *P. oryzae* and *P. urashimae* but no products for *P. grisea* or *P. pennisetigena*. Among these,  
335 483 (85.6%) were CH7BAC9-positive and came from 16 plant species, with the predominant  
336 hosts being wheat, followed by *Urochloa*, *Eleusine*, *Melinis*, and *Panicum* (Table 4). The  
337 CH7BAC9-negative isolates, suspected to be other *Pyricularia* species, mostly came from  
338 *Cenchrus echinatus*, *Digitaria* spp., and *Panicum maximum*.

339 Among the 483 *P. oryzae* isolates analyzed by PCR, 313 (64.8%) were identified as  
340 PoT based on the successful amplification of both C17 and MoT3. Only nine of these (2.7%)  
341 came from non-wheat hosts, with only three coming from *Urochloa* (Table 4). The other  
342 grasses found to be harboring PoT were *Cenchrus echinatus* (n = 1 isolate), *Eleusine indica* (n  
343 = 2), *Melinis repens* (n = 1), *Panicum maximum* (n = 1), and *Pennisetum* sp. (n = 1). Five of  
344 the nine PoT cross-infections on other grasses were for plants collected within, or adjacent to,  
345 wheat fields. The four other cases were in locations more than 30 km away from wheat fields,  
346 and only one of these remote cross infections was on *Urochloa* (Tables 6).

347 Sixteen of the isolates from wheat failed to yield amplicons for MoT3 and/or C17  
348 (Table S1). It is well known that certain wheat-infecting PoL1 haplotypes lack both C17 and  
349 MoT3 (M. Farman et al. 2017; Pieck et al. 2017; Thierry et al. 2020) and, therefore, eight C17-  
350 /MoT3<sup>-</sup> isolates that came from wheat were tentatively assigned as PoL1, pending further  
351 confirmation (see below).

352 TABLE 3. Summary information for the total number of blast-infected plant samples for each  
 353 of 31 Poaceae species, including wheat, from where *Pyricularia* sp. isolates were obtained  
 354 during four visits to both wheat-producing regions (Triângulo Mineiro and Centro-Sul de  
 355 Minas) and natural landscapes during summer (February, wheat off-season) and fall (May,  
 356 wheat-growing season) 2018 and 2019, MG, Brazil.  
 357

| Poaceae species                | N. of plant samples |                             | N. of <i>Pyricularia</i> spp. isolates <sup>c</sup> |
|--------------------------------|---------------------|-----------------------------|-----------------------------------------------------|
|                                | Total <sup>a</sup>  | Blast-infected <sup>b</sup> |                                                     |
| <i>Andropogon virginicus</i>   | 4                   | -                           | -                                                   |
| <i>Cenchrus echinatus</i>      | 21                  | 15                          | 25                                                  |
| <i>Chloris polydactyla</i>     | 4                   | -                           | -                                                   |
| <i>Chrysopogon zizanioides</i> | 4                   | -                           | -                                                   |
| <i>Cynodon dactylon</i>        | 6                   | 1                           | 1                                                   |
| <i>C. dictyoneura</i>          | 1                   | -                           | -                                                   |
| <i>C. plectostachyus</i>       | 1                   | 1                           | 1                                                   |
| <i>Cyperus rotundus</i>        | 12                  | -                           | -                                                   |
| <i>Digitaria horizontalis</i>  | 37                  | 14                          | 21                                                  |
| <i>D. insularis</i>            | 46                  | 15                          | 20                                                  |
| <i>D. sanguinalis</i>          | 61                  | 21                          | 31                                                  |
| <i>Echinochloa colonum</i>     | 2                   | 1                           | 1                                                   |
| <i>Eleusine indica</i>         | 50                  | 27                          | 42                                                  |
| <i>Eragrostis ciliaris</i>     | 6                   | -                           | -                                                   |
| <i>E. pilosa</i>               | 1                   | -                           | -                                                   |
| <i>Imperata brasiliensis</i>   | 2                   | -                           | -                                                   |
| <i>Melinis minutiflora</i>     | 31                  | -                           | -                                                   |
| <i>Melinis roseum</i>          | 20                  | 16                          | 28                                                  |
| <i>Panicum maximum</i>         | 127                 | 10                          | 19                                                  |
| <i>P. miliaceum</i>            | 3                   | -                           | -                                                   |
| <i>Paspalum notatum</i>        | 4                   | -                           | -                                                   |
| <i>Pennisetum sp.</i>          | 28                  | 2                           | 2                                                   |
| <i>Setaria viridis</i>         | 1                   | -                           | -                                                   |
| <i>Sorghum arundinaceum</i>    | 11                  | -                           | -                                                   |
| <i>Triticum aestivum</i>       | 505                 | 377                         | 670                                                 |

|                         |       |     |     |
|-------------------------|-------|-----|-----|
| <i>Urochloa arrecta</i> | 1     | -   | -   |
| <i>U. brizantha</i>     | 329   | 35  | 59  |
| <i>U. decumbens</i>     | 2     | -   | -   |
| <i>U. humidicola</i>    | 16    | 3   | 7   |
| <i>U. plantaginea</i>   | 24    | 3   | 3   |
| <i>U. ruziziensis</i>   | 8     | 1   | 2   |
| Total                   | 1,368 | 542 | 932 |

358 <sup>a</sup> Sample composed of 5 to 10 leaves of wheat or Poaceae weeds, or 1 to 3 wheat heads. <sup>b</sup> At least one  
359 *Pyricularia* sp. isolate. <sup>c</sup> Number of monoconidial isolates per sample. In cases more than one isolate  
360 was obtained from a sample, but not from the same tissue (leaf or head).

361

362

363 PoT isolates that contain C17 but lack MoT3 are also occasionally found (e.g., Islam *et*  
364 *al.* 2016). However, because C17 and MoT3 actually target loci in native grass-infecting  
365 populations (PoX and PoU3, respectively), absences of either marker (or both) yield  
366 inconclusive assignments (Table 1). For this reason, we sought to verify equivocal lineage  
367 designations by sequencing CH7BAC9 PCR products and/or genotyping-by-sequencing.

368 CH7BAC9 sequences were obtained for a total of 102 isolates which variously came  
369 from *Urochloa* sp. (n = 35), *Eleusine* (n = 42), *Melinis* (n = 8), *Cenchrus* (n = 2), *Panicum* (n  
370 = 10) and *Digitaria* (n = 5). These sequences were combined with the broader *P. oryzae* dataset  
371 and the phylogenetic relationships between the MG isolates and previously-established  
372 lineages were determined using maximum likelihood. This revealed a clear pattern of host  
373 specialization because most isolates grouped with lineages whose constituent members usually  
374 came from the same host (Fig. 2A, and Table 5). Four different CH7BAC9 alleles were found  
375 among the *Urochloa*-infecting isolates with two predominating. One of these matched the  
376 PoU3 lineage, while the other was identical to an allele found in a different species -  
377 *P. urashimae*. The minor alleles in the *Urochloa* pathogens matched PoM, and PoO/Le/P/S  
378 (which are indistinguishable because they all share the same sequence).

379 Most of the isolates from *Eleusine* (80%) grouped with the *Eleusine*-infecting lineages,  
380 PoE1/2 (which share the same allele) or PoE3 (28 PoE1/2 and 8 PoE3) (Fig. 2A and Table 5).  
381 The only examples of cross-infection on *Eleusine*, were two isolates from PoT, and three from  
382 the *P. oryzae Echinochloa* lineage (PoEc), which is represented by isolates from various hosts  
383 including *Digitaria*, *Echinochloa*, *Lolium*, *Zea*, and now *Eleusine* (Table 5, Table S1). The  
384 CH9BAC9 sequences for the isolates from *Melinis* all grouped with the sequence present in

385 the reference genome of a previous strain from this host, MrJA49 and, therefore, appear to  
 386 identify a new, phylogenetically-distinct, *Melinis*-adapted lineage.

387

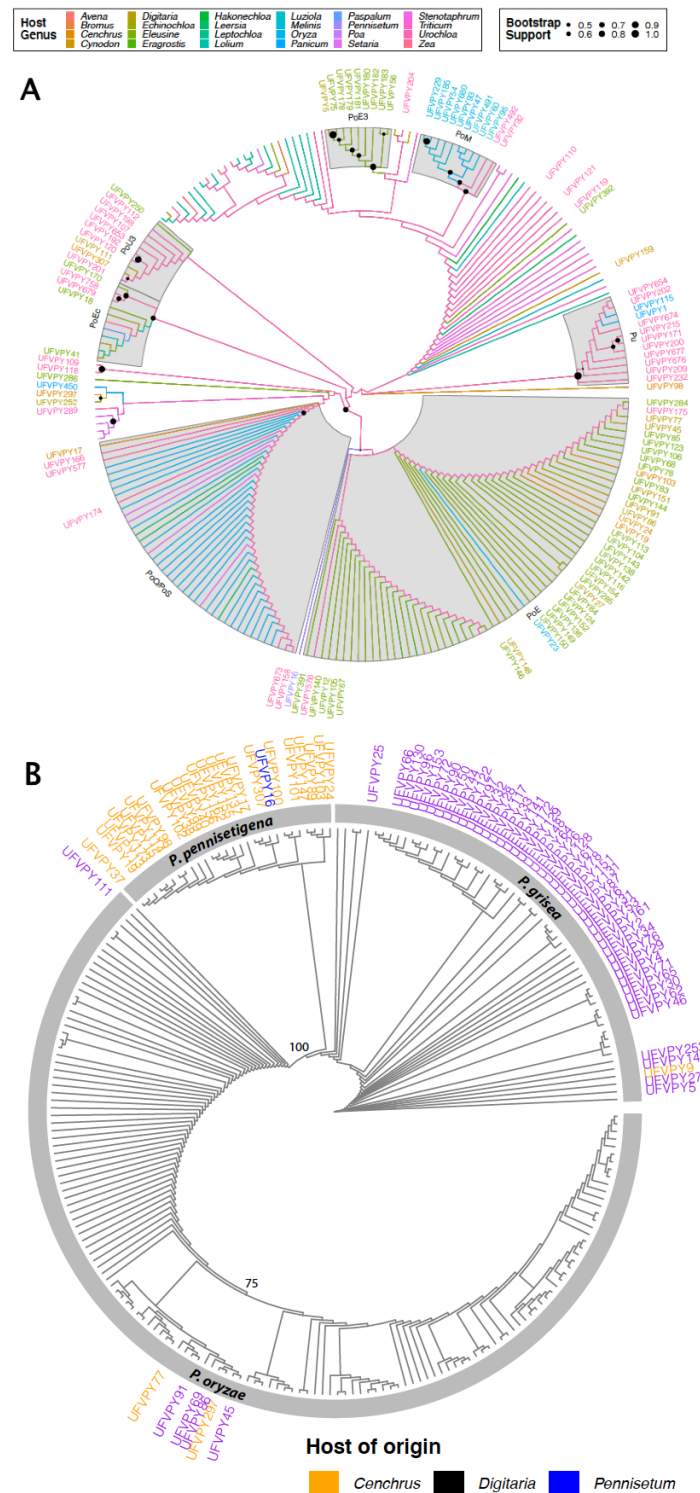

388

389 **Fig. 2.** Maximum likelihood trees used for lineage/species assignment of *Pyricularia* isolates collected from  
 390 grasses in MG. **A**, CH7BAC9 tree showing phylogenetic placement of *P. oryzae*/*P. urashimae* isolates. Tip labels  
 391 are provided only for isolates collected in this study and are colored according to the host-of-origin, as are the  
 392 branches for the unlabeled reference isolate. Phylogenetic lineages showing obvious host-specialization are  
 393 highlighted with gray boxes and named according to primary host as follows: PoEc, *Echinochloa*; PoE/PoE3,

394 *Eleusine*, PoM, *Melinis*; PoO/PoS *Oryza/Setaria*; PoU3, *Urochloa*; and Pu, *Pyricularia urashimae*. Nodes with  
 395 bootstrap support  $\geq 0.5$  are highlighted with proportionally-sized circles. The tree was drawn using ggtree with  
 396 the branch.length = "none" option, with the intention to show grouping patterns among isolates from the same  
 397 host. No inferences can be drawn from branch lengths. **B**, MPG1 tree showing phylogenetic placement of  
 398 *Pyricularia* isolates collected from *Cenchrus*, *Digitaria*, *Panicum* and *Urochloa*. For clarity, tip labels are shown  
 399 only for the isolates from MG, and their prefixes are in lowercase and abbreviated. Bootstrap values are provided  
 400 on key nodes. Tip labels are colored according to host-of-origin. The species designation for each phylogenetic  
 401 clade is also shown.  
 402

403 TABLE 4. Summary results of PCR assays in a subcollection of 572 strains from 16 Poaceae hosts  
 404 recovered of wheat (leaf and head) and grass weeds (leaves) from wheat-producing regions (Triângulo  
 405 Mineiro and Centro-Sul de Minas) and natural landscapes during summer (February, pre-season) and  
 406 fall (May, wheat-growing season) 2018 and 2019, MG, Brazil.  
 407

| Host of isolation             | <i>Pyricularia</i> sp. | <i>P. oryzae</i> | Lineages                     |         |
|-------------------------------|------------------------|------------------|------------------------------|---------|
|                               |                        |                  | PoT (proximity) <sup>a</sup> | Non-PoT |
| <i>Cenchrus echinatus</i>     | 20                     | 2                | 1 (away)                     | 1       |
| <i>Cynodon dactylon</i>       | 1                      | 0                | -                            | -       |
| <i>Cynodon plectostachyus</i> | 1                      | 1                | -                            | 1       |
| <i>Digitaria horizontalis</i> | 21                     | 2                | -                            | 2       |
| <i>Digitaria insularis</i>    | 20                     | 1                | -                            | 1       |
| <i>Digitaria sanguinalis</i>  | 18                     | 5                | -                            | 5       |
| <i>Echinochloa colonum</i>    | 1                      | 0                | -                            | -       |
| <i>Eleusine indica</i>        | 34                     | 32               | 2 (nearby)                   | 30      |
| <i>Panicum maximum</i>        | 16                     | 16               | 1 (nearby)                   | 15      |
| <i>Pennisetum sp.</i>         | 2                      | 1                | 1 (away)                     | -       |
| <i>Melinis roseum</i>         | 28                     | 28               | 1 (away)                     | 27      |
| <i>Triticum aestivum</i>      | 333                    | 331              | 324                          | 7       |
| Leaf                          | 127                    | 127              | 126                          | 1       |
| Head                          | 206                    | 204              | 198                          | 6       |
| <i>Urochloa brizantha</i>     | 57                     | 56               | 2 (nearby)                   | 54      |
| <i>Urochloa humidicola</i>    | 7                      | 7                | 1 (away)                     | 6       |
| <i>Urochloa plantaginea</i>   | 3                      | 2                | -                            | 2       |
| <i>Urochloa ruziziensis</i>   | 2                      | 2                | -                            | 2       |
| Total                         | 564                    | 483              | 329                          | 154     |

408 <sup>a</sup> distance of the isolates obtained from a grass plant relative to wheat fields. Nearby = less than 1km and away =  
 409 more than 50 km.



410 TABLE 5. Phylogenetic lineage affiliations of *Pyricularia* isolates obtained from wheat, and  
 411 endemic/cultivated grasses in MG, Brazil

| Host of isolation      | host-specialized isolates (host) <sup>a</sup> | cross-infecting isolates <sup>b</sup> |                                         |
|------------------------|-----------------------------------------------|---------------------------------------|-----------------------------------------|
|                        |                                               | Number                                | Primary lineage/species (# isolates)    |
| <i>Triticum/Lolium</i> | 304                                           | 10                                    | E1/2 (2), M (1), Pu (1), U3 (3), U4 (1) |
| <i>Cenchrus</i>        | 23                                            | 1                                     | T (1)                                   |
| <i>Cynodon</i>         | (1) <sup>c</sup>                              | 1                                     | Pp (1)                                  |
| <i>Digitaria</i>       | 45                                            | 4                                     | E1/2 (4)                                |
| <i>Eleusine</i>        | 36                                            | 5                                     | Ec (3), T (2)                           |
| <i>Melinis</i>         | 7                                             | 1                                     | U3 (1)                                  |
| <i>Panicum</i>         | 12                                            | 2                                     | T (1), U3 (1)                           |
| <i>Pennisetum</i>      | 1                                             | 1                                     | T (1)                                   |
| <i>Urochloa</i>        | 19 (U3/4), 24 (P) <sup>d</sup>                | 5                                     | M (2), T (3)                            |

412 <sup>a</sup> “host-specialized” isolates are defined as those belonging to a genetic lineage whose members are preferentially  
 413 found on one or more host genera. Note that isolates from *Echinochloa* (Ec) are not host-specialized.

414 <sup>b</sup> Isolates sampled from a host genus that is different to the one from which most lineage members were recovered.  
 415 E = *Eleusine*, Ec = *Echinochloa*, M = *Melinis*; Pp = *P. pennisetigena*; Pu = *P. urashimae*; U = *Urochloa*. Non-Po  
 416 are highlighted in bold.

417 <sup>c</sup> Tentative assignment because the lone isolate defines a new lineage (PoC2) for which no other members have  
 418 yet been identified.

419 <sup>d</sup> Host-specialized isolates from *Urochloa* belonged to two main lineages - one a known PoU lineage, the other  
 420 being a separate species, *P. urashimae*.

421

422 TABLE 6. Frequencies of positive (indicating a *Pyricularia oryzae* Triticum lineage - PoT)  
 423 and negative (indicating a non-PoT lineage) amplifications of the C17 primer (Thierry et al.  
 424 2020) for a set of 487 *Pyricularia* isolates obtained from leaves of grass plants located away  
 425 or nearby wheat fields or from leaves or heads of wheat plants displaying the typical blast  
 426 symptoms across several locations in MG state, Brazil.

427

| Host  | Proximity to wheat | C17+ (PoT)<br>Count (%) | C17- (non-PoT)<br>Count (%) | Sum |
|-------|--------------------|-------------------------|-----------------------------|-----|
| Wheat | -                  | 322 (97.9%)             | 7 (2.1%)                    | 329 |
| Grass | Nerby (< 1 km)     | 7 (10.6%)               | 59 (89.3%)                  | 66  |
|       | Away (> 30km)      | 2 (2.1%)                | 90 (98.1%)                  | 92  |
| Sum   |                    | 331                     | 156                         | 487 |

428

## 429 **Host-specialization in other *Pyricularia* species**

430 No CH7BAC9 PCR products were obtained for most of the isolates (73/84) from  
431 *Cenchrus*, *Digitaria*, and *Pennisetum*, which was consistent with the absence of this locus in  
432 the genome assemblies of representative isolates. For the few isolates that did yield amplicons,  
433 sequencing revealed that some of these loci were variously related to those found in PoE1/2 (4  
434 isolates from *Digitaria*; 1 from *Cenchrus*, 1 from *Pennisetum*) and PoO (one isolate from  
435 *Digitaria*) (Fig. 2A). Given the rarity of cross-species admixture in *Pyricularia* (unpublished  
436 data), these presumably were cases of cross-infection. Isolates from *Cenchrus*, *Digitaria*, and  
437 *Pennisetum* that failed to yield CH7BAC9 amplicons were characterized by amplifying and  
438 sequencing the MPG1 locus. Phylogenetic analysis of the resulting data, along with sequences  
439 from a number of reference isolates including *P. oryzae*, revealed that all of the isolates from  
440 *Digitaria* (n = 45) were *P. grisea*, while those from *Cenchrus* (n = 23), and the one from  
441 *Pennisetum* were *P. pennisetigena* (Fig. 2B). The MPG1 allele in the isolate from *Pennisetum*  
442 had the *P. pennisetigena* genotype. *P. pennisetigena* is named because the type isolate came  
443 from *Pennisetum* (Klaubauf et al. 2014). However, the present data indicate that *Cenchrus* is  
444 also a canonical host for this species.

## 445 **GBS confirmed that most *P. oryzae* lineages are host-specialized**

446 The combined results of the MoT3/C17 assays and CH7BAC9 sequencing identified  
447 very few PoT isolates on endemic grasses and, conversely, very few grass-adapted isolates on  
448 wheat (Table 6). However, because a small proportion of PoT isolates are known to lack MoT3,  
449 we considered it important to rule out the possibility that shifts in the PoT population had  
450 produced isolates that lack C17, or both MoT3 and C17. Therefore, to validate the lineage  
451 assignments made with MoT3, C17, and CH7BAC9, we used “MonsterPlex” - Floodlight  
452 Genomics LLC’s variation of the Hi-Plex2 assay (Hammet et al. 2019) - to perform  
453 genotyping-by-sequencing (GBS) on a selection of isolates from wheat (n = 66), *Urochloa* (n  
454 = 38), *Eleusine* (n = 6), *Hordeum* (n = 3), *Melinis* (n = 6) and *Panicum* (n = 11). We then  
455 examined their phylogenetic relationships to *in silico*-mined genotypes from a set of 232  
456 reference isolates whose lineage affiliations were already well established (e.g., Gladieux et al.  
457 2018).

458 Although the multiplex assay was originally designed to target only 84 SNPs, we  
459 identified a total of 228 variant sites within the targeted loci. Together, these SNPs were  
460 capable of resolving all 34 of the PoT haplotypes known to exist prior to this study (Rahnama

461 et al. 2021). Sixty-two of the 64 MG isolates identified as PoT using PCR-based diagnostics  
462 grouped with one of the two established PoT/PoL clades (Fig. 3). For the remaining pair of  
463 isolates, the GBS data revealed that they had been mis-characterized as PoT based on their  
464 MoT3/C17 amplification profiles (MoT3<sup>-</sup>/C17<sup>+</sup>). One was phylogenetically related to  
465 *Urochloa* pathogens (PoU3), and the other grouped with isolates from *Melinis* (PoM) (Fig. 3).  
466 These isolates represent the first false positives to have come from C17 diagnostics. Also  
467 analyzed were two isolates from wheat for which the original PCR tests failed altogether. One  
468 was found to be a PoU3 member, and the other grouped with other *Urochloa* pathogens in the  
469 PoU4 clade, which is phylogenetically related to *Panicum* pathogens (PoP).

470 GBS was also performed for MoT3<sup>-</sup> and/or C17<sup>-</sup> isolates from non-wheat hosts (*Eleusine*,  
471 *Melinis*, *Panicum*, and *Urochloa*) to test for possible cross-infections by PoT members with  
472 atypical genotypes. No such evidence was obtained because all isolates analyzed grouped  
473 outside of the PoT clades. The only potential cross-infections identified involved isolates from  
474 *Hordeum vulgare* (UFVPY247, 248, 249), which grouped with PoL1. Isolates from *Eleusine*  
475 and *Melinis* grouped strictly according to their respective hosts of origin, with the *Eleusine*  
476 pathogens belong to PoE1/2 (n = 4) and PoE3 (n = 1), and the *Melinis* isolates to PoM (n = 6).  
477 Only eleven of the 38 isolates from *Urochloa* belonged to a previously defined PoU lineage -  
478 this being PoU3. The remainder grouped in two novel *Urochloa*-associated clades, one related  
479 to torpedograss (*Panicum repens*) pathogens (PoU4, n = 3 isolates), and the other, a lineage  
480 that appears to fall under the umbrella of the sister species, *P. urashimae* (Pu, n = 24) because  
481 it houses PmJA1 and PmJA115 (Fig. 3), and these isolates possess Pu alleles for a number of  
482 reference genes. It should be noted that there were a large number of missing datapoints for  
483 isolates within the Pu lineage, presumably due to significant sequence divergence at the target  
484 loci affecting primer binding (~10%). However, there was also significant sequence divergence  
485 among the successfully amplified sites.

#### 486 **Identification of false positives for the MoT3 and C17 diagnostic markers**

487 A large fraction of the isolates from *Urochloa* and *P. maximum* exhibited a MoT3<sup>+</sup>/C17<sup>-</sup>  
488 genotype, which implied that these isolates are false positives for MoT3. This was confirmed  
489 using GBS (and genome sequencing, see Farman et al. 2022) which revealed that all of the  
490 MoT3<sup>+</sup> *Urochloa* pathogens are PoU3 and the positive *Panicum* pathogens belong to the *P.*  
491 *urashimae* lineage (Fig. 3). Conversely, isolate UFVPY183 from *Eleusine* (PoE3) and  
492 UFVPY578 from *Melinis* (PoM) reproducibly tested positive for C17 and negative for MoT3

493 and, therefore, are the first examples of non-PoT isolates that have given positive results for  
 494 C17.

495

496

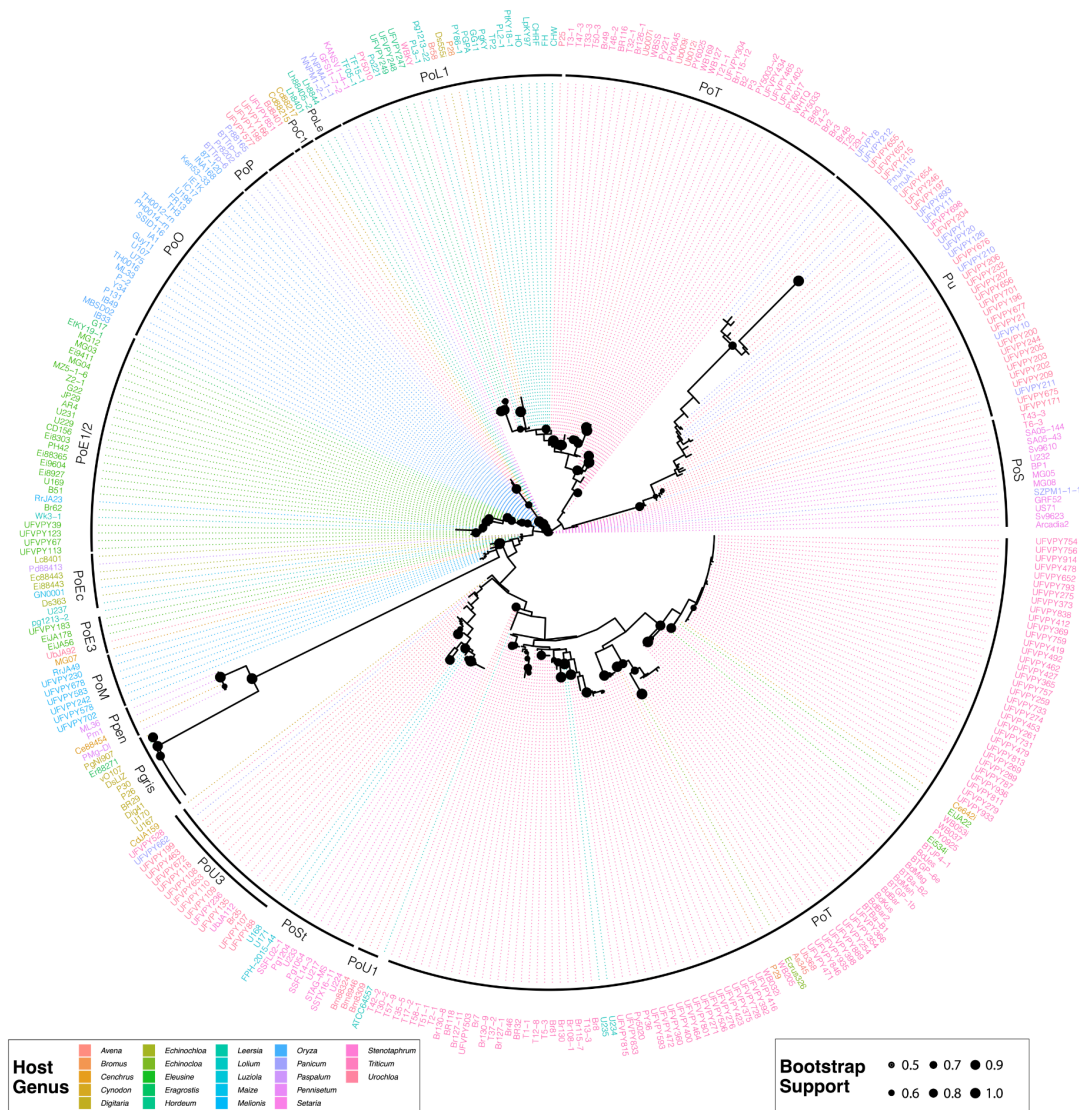

497

498 **Fig. 3.** Maximum Likelihood tree showing phylogenetic placement of *Pyricularia* isolates from MG as determined  
 499 using “MonsterPlex” genotyping-by-sequencing. Isolate names are colored according to host-of-origin and those  
 500 from MG are identified with a UVFPY prefix. Phylogenetic lineages are highlighted with black lines and are  
 501 labeled according to the primary host (as noted in Figure 2). PoU3 forms a subgroup of PoSt but is labeled  
 502 separately to emphasize that it constitutes a key, *Urochloa*-infecting population. Nodes with bootstrap support  $\geq$   
 503 0.5 are highlighted with proportionally-sized circles.  
 504

505 ***Triticum-Urochloa* specificity observed in the field may be due to inherent differences**  
 506 **in infection capability on canonical versus non-canonical hosts**

507 Molecular analysis of field isolates collected from wheat and *Urochloa* revealed that cross-  
 508 infection between the two hosts is uncommon. To explore whether this is due to inherent  
 509 differences in relative aggressiveness toward the respective hosts, we performed reciprocal  
 510 infection assays. In a first experiment, 14 PoT isolates (11 from wheat and three from  
 511 *Urochloa*) and six isolates that were obtained from *Urochloa* (three from the PoU3 lineage;  
 512 two from Pu and one from PoU4 - hereafter non-PoT) were inoculated on leaves of two wheat  
 513 cultivars (Guamirim and BRS18- Terena) and leaves of one signalgrass cultivar (Marandu). In  
 514 general, the isolates within each lineage were consistently and significantly more aggressive  
 515 on their primary host of origin (with the exception of the PoTs obtained from *Urochloa*) than  
 516 on the alternative host, although there were differences among individual isolates (Figs. 4, 5, 6  
 517 and 7).

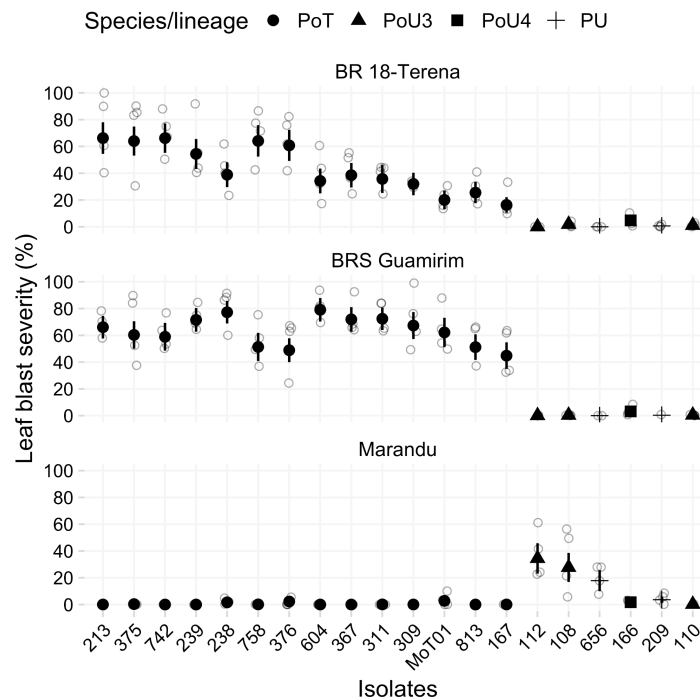

518

519 **Fig. 4.** Aggressiveness, expressed as percentage leaf area affected (% severity), evaluated in replicated greenhouse  
 520 experiments (foliar inoculations on two wheat cv. [BR18 Terena and Guamirim and one signalgrass cv  
 521 [Marandu]), for a set of 19 isolates (10 from wheat [*Triticum aestivum*], and 9 [six non-PoT] and three PoT = 742,  
 522 758 and 213] from signalgrass [*Urochloa* spp.]) of *Pyricularia oryzae* collected in MG state, Brazil and which  
 523 showed a positive (indicating *Triticum* lineage) or a negative (indicating non-*Triticum* lineage) reaction when  
 524 screened molecularly using the C17 primer set (Thierry et al. 2020). The non-PoT isolates were further identified  
 525 with genotype by sequencing: isolates 108, 110 and 112 = *Pyricularia oryzae* lineage *Urochloa*3; 166 = *P. oryzae*  
 526 lineage *Urochloa*4; 209 and 656 = *P. urashimae*. The MoT01 strain is PoT used as a reference for an aggressive  
 527 isolate collected in Passo Fundo, Brazil, and used (coded as 16MoT001) in screening for host resistance studies



528 (Cruppe et al. 2020). The empty circles represent values of replicates (two experiments combined), the symbols  
529 represent the mean values and the error bar is the 95% confidence limit.

530

531

532 On average, severity on the leaves induced by the PoT isolates ranged from 20 to 70% (mean  
533 = 44.1%) on BR18 Terena wheat and from 40 to 80% (mean = 63.1%) on BRS Guamirim  
534 wheat, across isolates. Severity induced by the non-PoT isolates on leaves of wheat was only  
535 1.39% and 0.73% on BR18 Terena and BRS Guamirim, respectively. Mean severity induced  
536 by PoT and non-PoT on Marandu signalgrass was 0.51% and 14.26%, respectively (Fig. 4). In  
537 the separate experiment, wheat heads of the same two cultivars were inoculated with the same  
538 set of PoT and non-PoT isolates.

539

540

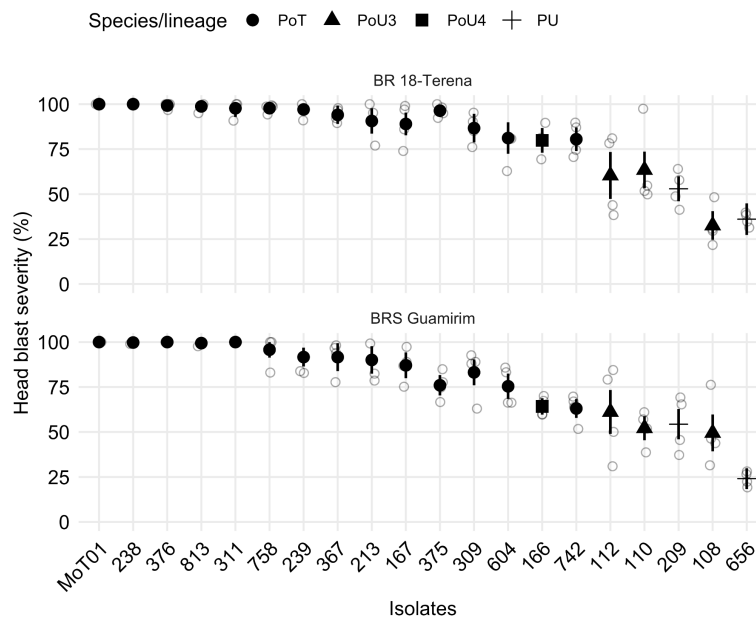

541

542 **Fig. 5.** Aggressiveness, expressed as percentage of affected spikelets (% severity), evaluated in replicated  
543 greenhouse experiments (head inoculations on two wheat cv., BR18 Terena and BRS Guamirim) for a set of 19  
544 isolates (10 from wheat [*Triticum aestivum*], and 9 [six non-PoT and three PoT = 742, 758 and 213] from  
545 signalgrass [*Urochloa* spp.]) of *Pyricularia oryzae* collected in MG state, Brazil and which showed a positive  
546 (indicating *Triticum* lineage) or a negative (indicating non-*Triticum* lineage) reaction when screened molecularly  
547 using the C17 primer set (Thierry et al. 2020). The non-PoT isolates were further identified with genotype by  
548 sequencing: isolates 108, 110 and 112 = *Pyricularia oryzae* lineage *Urochloa3*; 166 = *P. oryzae* lineage  
549 *Urochloa4*; 209 and 656 = *P. urashimae*. The MoT01 strain is a reference for an aggressive isolate collected in  
550 Passo Fundo, Brazil, and used (coded as 16MoT001) in screening for host resistance studies (Cruppe et al. 2020).  
551 The empty circles represent values of replicates (two experiments combined), the symbols represent the mean  
552 values and the error bar is the 95% confidence limit.

553



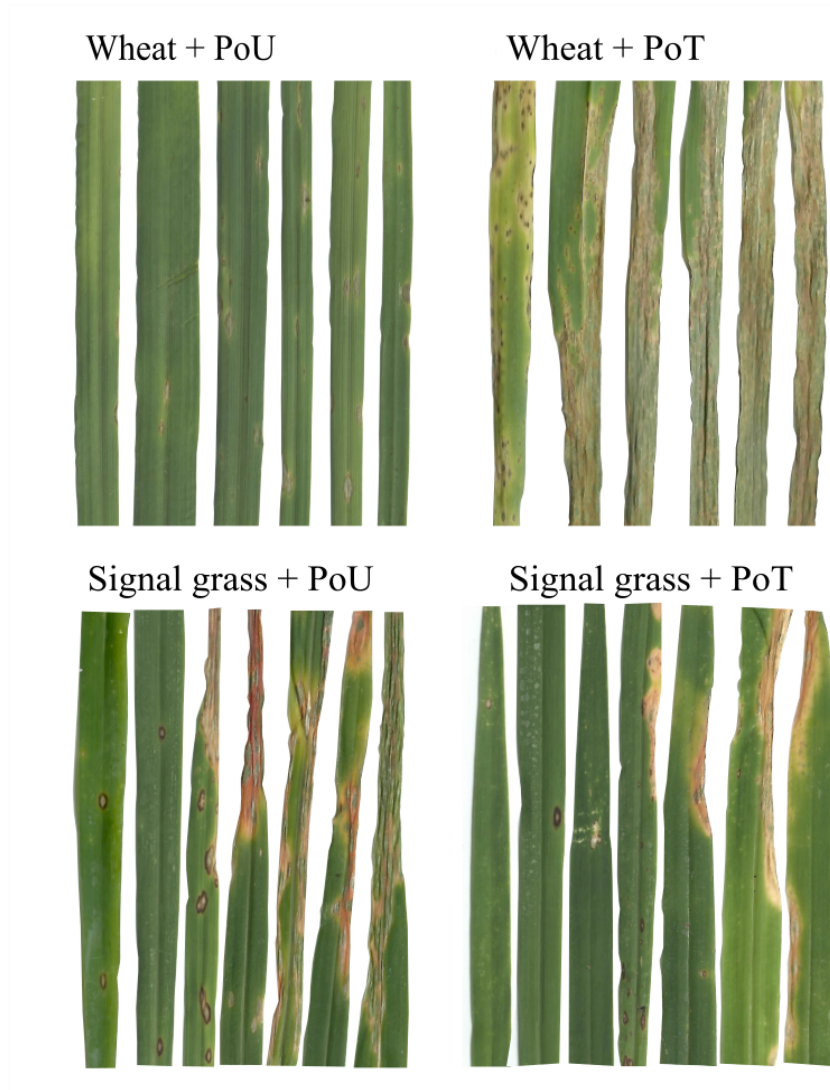

554

555 **Fig. 6.** Leaf blast disease symptoms resulting from cross-inoculations of *Pyricularia oryzae* lineages (PoT =  
556 *Triticum* lineage isolated from wheat; PoU3 = *Urochloa* lineage 3 isolated from signalgrass) on *Triticum aestivum*  
557 (cvs. BRS Guamirim) and *Urochloa brizantha* (cv. Marandu) under greenhouse conditions.  
558

559 The PoT isolates were generally more aggressive than the non-PoT isolates (Fig. 5 and 7).  
560 The percent of infected spikelets were, on average, 89% and 93% on BRS Guamirim and BR18  
561 Terena, respectively, when challenged with PoT isolates, including those three isolates  
562 obtained from *Urochloa* (Fig. 5). Contrarily, percent infected spikelets by the non-PoT isolates  
563 were on average 54.2% and 50.9% across the isolates (Fig. 5). It is worth noting that lesions  
564 caused by the non-PoT isolates on the affected spikelet were small and scattered, not affecting  
565 the entire spikelet (Fig. 7). On the other hand, most PoT isolates were highly aggressive,  
566 producing the typical bleaching of the affected spikelets (Fig. 7).

567

Wheat head + PoU

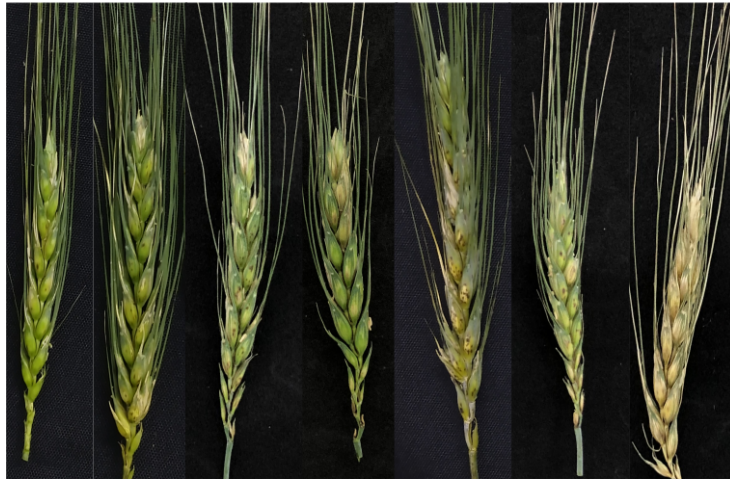

Wheat head + PoT

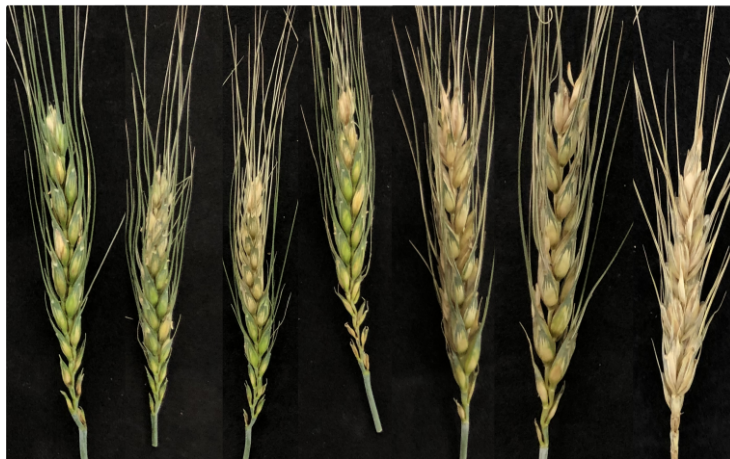

568

569 **Fig. 7.** Wheat head blast symptoms resulting from inoculation of *Pyricularia oryzae* lineages (PoT and PoU3) on  
570 *Triticum aestivum* (BRS Guamirim) under greenhouse conditions. PoT = *Triticum* lineage, isolated from wheat;  
571 PoU3 = *Urochloa* lineage 3 isolated from signalgrass.

572

573

## Discussion

574

575 Over four separate sampling trips spanning two years (prior to and during the wheat growing  
576 season), we generated a comprehensive collection of *Pyricularia* isolates obtained from blast  
577 lesions on endemic grasses grown near to or away from wheat fields. The grass genera from  
578 which we recovered non-PoT *Pyricularia* were *Cenchrus*, *Cynodon*, *Digitaria*, *Eleusine*,  
579 *Hordeum*, *Melinis*, *Panicum*, *Pennisetum*, and *Urochloa*. At the same time, we established the  
580 first extensive collection of several hundreds of isolates obtained from wheat cultivated in both  
581 southern and western regions of MG, Brazil.

582 A large majority of isolates could be reliably identified down to species/lineage through  
583 amplification/sequencing of just three PCR-based markers. Successful amplification of

584 CH7BAC9 by itself distinguished *P. oryzae* from the other species, and positive amplification  
585 for both MoT3 and C17 (Pieck et al. 2017; Thierry et al. 2020) proved to be definitive for PoT.  
586 Amplification of either MoT3 or C17 alone, however, yielded equivocal results. Although  
587 MoT3 showed early promise as a PoT diagnostic, occasional exceptions (false  
588 positives/negatives) have been reported (Pieck et al. 2017; Yasuhara-Bell et al. 2018). In the  
589 past, the most common exceptions involved wheat-infecting members of the related PoL1  
590 lineage which are MoT3<sup>-</sup>/C17<sup>-</sup>. We found that 2.5% (9/394) of the wheat blast isolates from  
591 MG wheat fell into this category. More concerning, however, we found an extremely high  
592 frequency of false positives, with 41% (64/157) of non-PoT isolates yielding a MoT3<sup>+</sup> reaction.  
593 This result is attributable to the fact that PoT/PoL1 have hybrid genomes, and the MoT3 locus  
594 was acquired from the PoU3 lineage (Rahnama et al. 2021), which is abundantly represented  
595 among *P. oryzae* isolates from *Urochloa*. Additionally, a highly similar, and amplifiable, MoT3  
596 sequence was ubiquitously present in *P. urashimae* isolates from *Panicum maximum* (14/14)  
597 (Table S1). Consequently, assays that survey MoT3 alone are unreliable for PoT detection,  
598 which throws into question conclusions from a recent study which used MoT3 amplification to  
599 assess the presence of PoT on Brazilian grasses, including *Urochloa* spp. (Maciel et al. 2023).  
600 Because all MoT3<sup>+</sup> isolates in that study came from *Urochloa* (13/58; 22.4%), it is quite  
601 possible that none of the isolates sampled in that study were PoT, especially considering the  
602 low frequency of PoT we found on *Urochloa*. It would, therefore, be instructive to reassess  
603 PoT prevalence after performing C17 assays.

604 Here, it should also be stressed that the specificity of the C17 assay was also not perfect.  
605 Although C17 yielded positive results for the nine PoT isolates that were MoT3<sup>-</sup>, we recorded  
606 the first examples of false positives in isolates from *Eleusine* (PoE3) and *Melinis* (PoM). This,  
607 again, is not surprising because PoT inherited the C17 locus from another - in this case,  
608 unknown - *P. oryzae* lineage (PoX) (Rahnama et al 2022), which means that this locus, too,  
609 will yield false positive results when isolates from the relevant host(s) are sampled. Therefore,  
610 for reliable PoT detection, at a minimum we recommend that both MoT3 and C17 be surveyed  
611 in parallel. Finally, it is also important to note that the current formulation of the MonsterPlex  
612 assay, while being highly effective at lineage assignment for most isolates, and identifying new  
613 lineages, is also not capable of positively identifying PoT. This is because several known PoT  
614 isolates group with PoL1, while others such as PoT6 and PoT29, group with neither PoT, nor  
615 PoL1 (Fig. 3). This is not surprising because the assay was originally designed with the main  
616 goal of distinguishing the B71 lineage from all other PoT (Tembo et al. 2021).

617 Overall, among the 572 *Pyricularia* spp. isolates, *P. oryzae* dominated the collection  
618 (87%) and this likely reflected the fact that other *Pyricularia* were much more host-restricted,  
619 with *P. pennisetigena* being found almost exclusively on *Cenchrus*, *P. grisea* on *Digitaria*, and  
620 *P. urashimae* on *Panicum* and *Urochloa*. By way of contrast, *P. oryzae* was recovered from all  
621 the genera that yielded *Pyricularia*, except *Cenchrus*; and accounted for all but two of the  
622 isolates sampled from wheat heads (n = 333). Thus, species outside of the *P. oryzae* clade are  
623 very unlikely to cause wheat blast. This is contrary to what has been suggested following  
624 controlled environment studies, which reported pathogenicity and high aggressiveness of *P.*  
625 *pennisetigena* and *P. zingibericola* - from grasses in Brazil - to Anahuac 75, a wheat cultivar  
626 regarded as universally susceptible cultivar to PoT (Reges et al. 2016).

627 The *P. oryzae* isolates we collected from non-wheat/*Lolium* hosts grouped into nine  
628 distinct lineages/species variously specialized on eight different grass genera, most of which  
629 were previously known hosts, including *Cynodon*, *Echinochloa*, *Eleusine*, *Urochloa*  
630 (Borromeo et al. 1993), and *Hordeum* (Urashima et al. 2004). Although we identified members  
631 of previously known lineages (PoE1/2) in association with the expected hosts, a majority of  
632 isolates belonged to new phylogenetic lineages. These also showed evidence of host-  
633 specialization because constituent members were usually isolated from the same genus/species.  
634 These included PoE3 specialized on *Eleusine*, PoM (from *Melinis*), PoU3 and PoU4 (both on  
635 *Urochloa*). One additional lineage was identified (PoC2 from *Cynodon*) but was only  
636 represented by one isolate, so its host-specialization status is unclear.

637 We also report *P. maximum* as a new host for *P. urashimae* (Pu), the type isolate of  
638 which originally came from *Urochloa brizantha* (Crous et al. 2016). This seems to be quite a  
639 specific interaction from *P. maximum*'s perspective because 12/16 isolates from this grass were  
640 in the Pu phylogenetic group, with limited cross-infection by PoM, and PoT having been  
641 observed. However, most Pu members came from *Urochloa*, indicating that the lineage has  
642 dual specificity. This property might be partially explained by the GBS data, which suggests  
643 that the Pu species is highly diverse, such that it too, like *P. oryzae*, might comprise a number  
644 of genetically-distinct sub-lineages, with some being specialized on *P. maximum*, and others  
645 on *Urochloa*.

646 Although our primary motivation for sampling wheat blast was to examine the extent  
647 of cross-infection by grass-adapted lineages, the GBS data also provided key insights into the  
648 MG wheat blast population. A recent phylogenomic analysis revealed that wheat blast and gray  
649 leaf spot co-evolved very recently through a series of admixtures involving *P. oryzae* isolates



650 from five different host-specialized populations. This resulted in a set of distinct chromosomal  
651 haplotypes, that are defined by the specific chromosome segments they inherited from the  
652 various donor isolates (Rahnama et al. 2021). To date, 37 distinct haplotypes have been found  
653 on wheat (34 PoT; 3 PoL1). The MG wheat blast isolates defined eight phylogenetic groups,  
654 none of which perfectly matched the known haplotypes; and because so few mutations have  
655 arisen since wheat blast/gray leaf spot evolved (Rahnama et al 2022), the MG blast population  
656 most likely have new chromosomal haplotypes. Given that all of the PoT isolates analyzed  
657 previously came from other states, namely Paraná, Rio Grande do Sul, Mato Grosso do Sul,  
658 Goiás, and São Paulo, this suggests that there may be regional differences in the genetic  
659 composition of the South American wheat blast population.

660 We found that the vast majority of *Pyricularia* isolates collected from endemic grasses  
661 in MG state were genetically distinct from PoT, with most belonging to phylogenetic groups  
662 consistent with their host-of-origin. This is in striking contrast with the findings of prior studies  
663 of *Pyricularia* collected from grasses in Brazil, where all but one of the characterized isolates  
664 were members of the PoT or PoL1 populations. We conclude that these earlier studies made  
665 the mistake of only sampling infected weeds beneath, or immediately adjacent to, infected  
666 wheat plants, as implied by the GPS coordinates provided in the relevant reports (Maciel et al.  
667 2014; Castroagudín et al. 2016). Consistent with this interpretation, most of the weeds we found  
668 to be harboring PoT were collected near to heavily infected wheat plots. There appears to be  
669 no obvious pattern to PoT's cross-infectivity, because we identified it on six different host  
670 genera. Together with the data from prior studies (Castroagudín et al. 2016; Maciel et al. 2014),  
671 this expands the list of alternative hosts for PoT to ten (*Bromus*, *Cenchrus*, *Digitaria*,  
672 *Echinochloa*, *Eleusine*, *Lolium*, *Melinis*, *Panicum*, *Pennisetum*, and *Urochloa*). Further, if we  
673 include PoL1 isolates based on the fact that some of its members can also infect wheat, this  
674 also adds *Avena*, and *Hordeum* as potential surrogate wheat blast hosts.

675 The discovery of seven non-PoT/PoL isolates on wheat was rather surprising because,  
676 with the exception of PoL1 lineage members, cross-infection of wheat by other host-adapted  
677 forms of *P. oryzae* has never been shown beforehand. Four of the isolates were collected in the  
678 same wheat field in the Triangulo Mineiro region, along with 40 PoT strains. It is possible that  
679 we were successful in identifying these novel cases due to the repeated sampling from the same  
680 field, and the fact that we specifically screened for fungal isolates that were MoT3/C17-.

681 Here, we greatly expand on understanding of the *Pyricularia* populations colonizing  
682 endemic grasses in Brazil, especially when we consider that prior efforts to characterize grass-

683 infecting populations in Brazil (Castroagudín et al. 2017; Castroagudín et al. 2016; Ceresini et  
684 al. 2018, 2019) ended up sampling just one isolate from a grass-adapted lineage (Farman et al,  
685 202). That isolate, Ds555i (a.k.a. 12.1.555i, from *Digitaria*), is a member of the PoEc  
686 (*Echinocloa*) lineage which distinguishes itself by the absence of host-specialization among its  
687 constituent members. Interestingly, we found two PoEc members on a previously unknown  
688 host of this lineage - *Eleusine*. As a rule, we found cross-infections to be fairly uncommon in  
689 MG, with most *Pyricularia* populations exhibiting significant host-specialization and, although  
690 members of non-adapted lineages were routinely recovered from most of the sampled genera,  
691 the isolates found on non-canonical hosts were fairly evenly distributed among the different  
692 lineages. This finding, along with the discovery that certain host genera are susceptible to  
693 multiple genetically-distinct lineages (e.g. *Cynodon*, *Eleusine*, *Hordeum*, *Panicum*, *Urochloa*)  
694 implies that host-specificity barriers to *P. oryzae* are somewhat fluid and, therefore, reinforces  
695 the notion that most lineages are “host-adapted” or “host-specialized,” as opposed to “host-  
696 specific.”

697         A main focus of our study was to characterize the fungal population(s) found on  
698 *Urochloa* because we suspected that prior studies implicating this host as a central player in  
699 the evolution, inoculum development and epidemic spread of wheat blast (Ceresini et al. 2018,  
700 2019; Maciel et al. 2014; Stukenbrock and McDonald, 2008) were incorrect due to flaws in  
701 both sampling and phylogenetic inference (see Farman et al. 2022). Previous studies only  
702 sampled two *P. oryzae* lineages from *Urochloa* - PoT and PoL1 (Castroagudín et al. 2017;  
703 Castroagudín et al. 2016; Ceresini et al. 2018, 2019). Here, we identified an additional seven  
704 lineages on the genus (PoU1, PoU2, PoU3, PoU4, PoE3, PoL, PoM, PoSt, and PoT), as well  
705 as *P. urashimae*. At first, this might imply that *Urochloa* is a “universally susceptible” host.  
706 However, most isolates were placed in the *Urochloa*-adapted lineages, PoU3 and PoU4, or the  
707 highly diverse *P. urashimae* (Pu) clade, which is dually specialized on *Urochloa* and *P.*  
708 *maximum*. Thus, the small number of isolates from various other lineages found on *Urochloa*,  
709 probably reflects a low level of inherent, base-line cross-infectivity across the species.

710         We found that PoT was rarely recovered from infected *Urochloa* plants sampled away  
711 from wheat plots with only one out of 67 isolates being a PoT member. The low frequency of  
712 wheat <-> *Urochloa* cross-infection found in nature seems to be correlated with innate  
713 compatibility differences because, using cross-inoculation experiments, we found that PoT  
714 members were consistently more aggressive on wheat leaves, and the isolates from *Urochloa*  
715 (PoU3/4 and Pu) were more aggressive on signalgrass. Thus, our findings hold to the general



716 pattern that PoT is usually more aggressive on wheat, while non-PoT/non-*P. oryzae* isolates  
717 tend to be less aggressive, even under favorable, controlled environments (Chung et al. 2020;  
718 Kato et al. 2000; Reges et al. 2016, 2019). And, even though the *Urochloa* pathogens showed  
719 incidences on the spikelets up to 50%, after spraying spikelets, the percent diseased area was  
720 apparently rather low, and the symptoms were mild, consisting of small, reddish-brown to dark-  
721 gray spots, or even hypersensitive reactions. This was in striking contrast to the symptoms  
722 caused by PoT isolates, which were characterized by bleaching of the heads. It seems doubtful  
723 that inconspicuous lesions on spikes caused by non-PoT isolates are likely to cause significant  
724 yield loss, although this should be further confirmed using polycyclic infection assays. It should  
725 also be noted that *Urochloa* leaves collected from the field often showed an abundance of blast-  
726 like symptoms but the vast majority of lesions failed to produce the profuse sporulation  
727 characteristic of *Pyricularia* infection after overnight humidification. True blast infections  
728 typically show rapid and abundant sporulation from all lesions and, therefore, it appears that  
729 not only was PoT rarely recovered from *Urochloa* but the incidence of blast was also a lot  
730 lower than was initially apparent based on macroscopic symptoms.

731 Prior studies have implied that cross infection of *Urochloa* by PoT is significant and  
732 widespread (Castroagudín et al. 2017; Ceresini et al. 2018, 2019; Maciel et al. 2023), and a  
733 major concern for wheat blast management. Overall, our data challenge this idea because most  
734 *Pyricularia* isolates from signalgrasses - even ones collected in proximity to wheat fields -  
735 belonged to *Urochloa*-specific lineages; and members of these lineages were recovered from  
736 wheat even less frequently than was PoT from *Urochloa*. In addition, blast-like lesions were  
737 rarely observed on signalgrasses growing at remote distances from wheat fields, and were  
738 sometimes even hard to find on signalgrass plants immediately adjacent to devastated wheat  
739 (personal observations). Thus, we feel we can propose an equally viable hypothesis that  
740 infected wheat more often serves as a source of inoculum for the occasional cross-infection of  
741 nearby *Urochloa*. Of course, we cannot rule out the possibility that the low prevalence of PoT  
742 on *Urochloa*, and the low sporulation capacity, might still be sufficient to produce an inoculum  
743 reservoir to trigger seasonal epidemics, and facilitate long-range movement. However, it  
744 should be noted that PoT was found as often on other weedy grasses, as it was on *Urochloa*  
745 and, therefore, the proportional contributions of these different grasses, if any, to wheat blast  
746 epidemiology remains an open question.

747

748

## Acknowledgements

749

750

751

752

753

754

755

756

757

This work was supported by the United States Department of Agriculture, Agriculture and Food Research Initiative grant 2013-68004-20378, multistate project NE1602; Agricultural Research Service project 8044-22000-046-00D; Hatch project KY012037; the National Science Foundation, MCB-1716491; and the University of Kentucky College of Agriculture Food and the Environment. Emerson M. Del Ponte was supported by the National Council for Scientific and Technological Development (CNPq) through a Productivity Research Fellowship (PQ) project 310208/2019-0, and through research grants provided by FAPEMIG. João P. Ascari and Luis I. Cazón were supported by CNPq through doctoral scholarships.

758

## Literature Cited

- 759 Barea, G., and Toledo, J. 1996. Identificación y zonificación de *Pyricularia* o brusone  
760 (*Pyricularia oryzae*) en el cultivo de trigo en el departamento de Santa Cruz (Informe  
761 Técnico Proyecto de Investigación Trigo, pp. 76–86). Centro de Investigación Agrícola  
762 Tropical.
- 763 Borromeo, E. S., Nelson, R. J., Bonman, J. M., and Leung, H. 1993. Genetic differentiation  
764 among isolates of *Pyricularia* infecting rice and weed hosts. *Phytopathology* 83:393–399.
- 765 Cabrera, M. G., and Gutierrez, S. A. 2007. Primer registro de *Pyricularia oryzae* en cultivos  
766 de trigo del NE de Argentina. In *Jornada de Actualización en Enfermedades de Trigo* pp.  
767 18–180. Instituto Fitotécnico de Santa Catalina.
- 768 Castroagudín, V., Danelli, A., Intra Moreira, S., Teodora de Assis Reges, J., Carvalho, G.,  
769 Maciel, J. L. N., Bonato, A. L. V., Forcelini, C. A., Alves, E., McDonald, B., Croll, D., and  
770 Ceresini, P. 2017. The wheat blast pathogen *Pyricularia graminis-tritici* has complex  
771 origins and a disease cycle spanning multiple grass hosts. *BioRxiv*.  
772 <https://doi.org/10.1101/203455>
- 773 Castroagudín, V. L., Moreira, S. I., Pereira, D. A. S., Moreira, S. S., Brunner, P. C., Maciel, J.  
774 L. N., Crous, P. W., McDonald, B. A., Alves, E., and Ceresini, P. C. 2016. *Pyricularia*  
775 *graminis-tritici*, a new *Pyricularia* species causing wheat blast. *Persoonia - Mol. Phylogeny*  
776 *Evol. Fungi* 37:199–216.
- 777 Casal-Martínez, C. C., Reyes-Caballero, Y. M., Chávez, A., Pérez-Estigarribia, P. E., Rojas,  
778 A., Arrua, A., Moura-Mendes, J., Lopez-Nicora, H. D., and Kohli, M. M. 2021. First report  
779 of a leaf blight caused by *Pyricularia pennisetigena* on *Cenchrus echinatus* in Paraguay.  
780 *Plant Dis.* 105:3758.
- 781 Ceresini, P. C., Castroagudín, V. L., Rodrigues, F. Á., Rios, J. A., Aucique-Pérez, C. E.,  
782 Moreira, S. I., Croll, D., Alves, E., de Carvalho, G., Maciel, J. L. N., and McDonald, B. A.  
783 2019. Wheat blast: From its origins in South America to its emergence as a global threat.  
784 *Molecular Plant Pathol.*, 20:155–172.
- 785 Ceresini, P. C., Castroagudín, V. L., Rodrigues, F. Á., Rios, J. A., Eduardo Aucique-Pérez, C.,  
786 Moreira, S. I., Alves, E., Croll, D., and Maciel, J. L. N. 2018. Wheat blast: past, present,  
787 and future. *Annu. Rev. Phytopathol.* 56:427–456.
- 788 Chung, H., Goh, J., Han, S.-S., Roh, J.-H., Kim, Y., Heu, S., Shim, H.-K., Jeong, D. G., Kang,  
789 I. J., and Yang, J.-W. 2020. Comparative pathogenicity and host ranges of *Magnaporthe*  
790 *oryzae* and related species. *Plant Pathol. J.* 36:305–313.
- 791 Coelho, M. A. de O., Torres, G. A. M., Cecon, P. R., and Santana, F. M. 2016. Sowing date  
792 reduces the incidence of wheat blast disease. *Pesq. Agropec. Bras.* 51:631–637.
- 793 Couch, B. C., Fudal, I., Lebrun, M.-H., Tharreau, D., Valent, B., van Kim, P., Nottéghem, J.-  
794 L., and Kohn, L. M. 2005. Origins of host-specific populations of the blast pathogen  
795 *Magnaporthe oryzae* in crop domestication with subsequent expansion of pandemic clones  
796 on rice and weeds of rice. *Genetics* 170:613–630.
- 797 Couch, B. C., and Kohn, L. M. 2002. A multilocus gene genealogy concordant with host  
798 preference indicates segregation of a new species, *Magnaporthe oryzae*, from *M. grisea*.  
799 *Mycologia* 94:683–693
- 800 Crous, P. W., Wingfield, M. J., Burgess, T. I., Hardy, G. E. St. J., Crane, C., Barrett, S., Cano-

- 801 Lira, J. F., Le Roux, J. J., Thangavel, R., Guarro, J., Stchigel, A. M., Martín, M. P., Alfredo,  
802 D. S., Barber, P. A., Barreto, R. W., Baseia, I. G., Cano-Canals, J., Cheewangkoon, R.,  
803 Ferreira, R. J., ... Groenewald, J. Z. 2016. Fungal Planet description sheets: 469–557.  
804 *Persoonia* : Mol. Phylogeny Evol. Fungi 37:218–403.
- 805 Cruppe, G., Cruz, C. D., Peterson, G., Pedley, K., Asif, M., Fritz, A., Calderon, L., Lemes da  
806 Silva, C., Todd, T., Kuhnem, P., Singh, P. K., Singh, R. P., Braun, H.-J., Barma, N. C. D.,  
807 and Valent, B. 2020. Novel sources of wheat head blast resistance in modern breeding lines  
808 and wheat wild relatives. *Plant Dis.* 104:35–43.
- 809 Cruz, C. D., Bockus, W. W., Stack, J. P., Valent, B., Maciel, J. N., and Peterson, G. L. 2016.  
810 A standardized inoculation protocol to test wheat cultivars for reaction to head blast caused  
811 by *Magnaporthe oryzae* (*Triticum* pathotype). *Plant Health Prog.* 17:186–187.
- 812 Cruz, C. D., Kiyuna, J., Bockus, W. W., Todd, T. C., Stack, J. P., and Valent, B. 2015.  
813 *Magnaporthe oryzae* conidia on basal wheat leaves as a potential source of wheat blast  
814 inoculum. *Plant Pathol.* 64:1491–1498.
- 815 Cruz, C. D., and Valent, B. (2017). Wheat blast disease: Danger on the move. *Trop. Plant*  
816 *Pathol.*, 42:210–222.
- 817 Dean, R., Kan, J. a. L. V., Pretorius, Z. A., Hammond-Kosack, K. E., Pietro, A. D., Spanu, P.  
818 D., Rudd, J. J., Dickman, M., Kahmann, R., Ellis, J., and Foster, G. D. 2012. The Top 10  
819 fungal pathogens in molecular plant pathology. *Mol. Plant Pathol.* 13:414–430.
- 820 Dianese, A. D. C., Zaccaroni, A. B., de Souza, B. C. P., da Silva Pagani, A. P., Pinheiro, N. O.,  
821 de Castro Gomes, E. M., Torres, G. A. M., Consoli, L., and Café-Filho, A. C. 2021.  
822 Evaluation of wheat genotypes for field resistance to wheat blast caused by *Magnaporthe*  
823 *oryzae* pathotype *Triticum* (MoT) and correlation between yield loss and disease incidence  
824 in the Brazilian Cerrado. *Euphytica* 217:1-13.
- 825 Santos, G. B., de Oliveira Coelho, M. A., and Del Ponte, E. M. 2022. Critical-point yield loss  
826 models based on incidence and severity of wheat head blast epidemics in the Brazilian  
827 Cerrado. *Eur. J Plant Pathol.* Early view at <https://doi.org/10.1007/s10658-022-02614-7>
- 828 Farman, M. L. 2002. *Pyricularia grisea* isolates causing gray leaf spot on perennial ryegrass  
829 (*Lolium perenne*) in the United States: Relationship to *P. grisea* isolates from other host  
830 plants. *Phytopathology* 92:245–254.
- 831 Farman, M., Peterson, G., Chen, L., Starnes, J., Valent, B., Bachi, P., Murdock, L., Hershman,  
832 D., Pedley, K., Fernandes, J. M., and Bavaresco, J. 2017. The *Lolium* pathotype of  
833 *Magnaporthe oryzae* recovered from a single blasted wheat plant in the United States. *Plant*  
834 *Dis.* 101:684–692.
- 835 Farman, M. L. Ascari, J. P., Rahnama, M., Ponte, E. M. D., Pedley, K. F., Martinez, S.,  
836 Fernandes, J. M. C., & Valent, B. 2022. A re-evaluation of phylogenomic data reveals that  
837 current understanding in wheat blast population biology and epidemiology is obfuscated  
838 by oversights in population sampling (p. 2022.12.19.521104). bioRxiv.  
839 <https://doi.org/10.1101/2022.12.19.521104>
- 840 Gladieux, P., Condon, B., Ravel, S., Soanes, D., Maciel, J. L. N., Nhani, A., Chen, L., Terauchi,  
841 R., Lebrun, M.-H., Tharreau, D., Mitchell, T., Pedley, K. F., Valent, B., Talbot, N. J.,  
842 Farman, M., and Fournier, E. 2018. Gene flow between divergent cereal- and grass-specific  
843 lineages of the rice blast fungus *Magnaporthe oryzae*. *MBio* 9:e01219-17.

- 844 Goulart, A. C. P., and Paiva, F. de A. 2000. Avaliação de perdas no rendimento de grãos de  
845 trigo causadas por *Pyricularia grisea*, no período de 1988 a 1992, em Mato Grosso do Sul  
846 (7th ed.). Embrapa.
- 847 Goulart, A. C. P., Paiva, F., and Mesquita, A. N. 1990. Occurrence and losses caused by wheat  
848 (*Triticum aestivum* L.) blast (*Pyricularia oryzae* Cav.) in the state of Mato Grosso do Sul,  
849 in 1988. In Annual Wheat Newsletter (Vol. 36). Department of Agronomy, Colorado State  
850 University.
- 851 Gupta, D. R., Surovy, M. Z., Mahmud, N. U., Chakraborty, M., Paul, S. K., Hossain, Md. S.,  
852 Bhattacharjee, P., Mehebab, Md. S., Rani, K., Yeasmin, R., Rahman, M., and Islam, M. T.  
853 2020. Suitable methods for isolation, culture, storage and identification of wheat blast  
854 fungus *Magnaporthe oryzae* Triticum pathotype. *Phytopathol. Res.* 2:1-13.
- 855 Hammet, F., Mahmood, K., Green, T. R., Nguyen-Dumont, T., Southey, M. C., Buchanan, D.  
856 D., Lonie, A., Nathanson, K. L., Couch, F. J., Pope, B. J., and Park, D. J. 2019. Hi-Plex2:  
857 A simple and robust approach to targeted sequencing-based genetic screening.  
858 *BioTechniques*, 67:118–122.
- 859 IBGE. 2017. Censo Agropecuário. Instituto Brasileiro de Geografia e Estatística. Online at  
860 [https://www.ibge.gov.br/estatisticas/economicas/agricultura-e-pecuaria/21814-2017-](https://www.ibge.gov.br/estatisticas/economicas/agricultura-e-pecuaria/21814-2017-censo-agropecuario.html?=&andt=o-que-e)  
861 [censo-agropecuario.html?=&andt=o-que-e](https://www.ibge.gov.br/estatisticas/economicas/agricultura-e-pecuaria/21814-2017-censo-agropecuario.html?=&andt=o-que-e)
- 862 Igarashi, S., Utiamada, C. M., Igarashi, L. C., Kazuma, A. H., and Lopes, R. S. 1986.  
863 Occurrence of *Pyricularia* sp. in wheat (*Triticum aestivum* L.) in the State of Paraná, Brazil.  
864 *Fitopatol. Bras.* 11:351–352.
- 865 Islam, M. T., Croll, D., Gladioux, P., Soanes, D. M., Persoons, A., Bhattacharjee, P., Hossain,  
866 Md. S., Gupta, D. R., Rahman, Md. M., Mahboob, M. G., Cook, N., Salam, M. U., Surovy,  
867 M. Z., Sancho, V. B., Maciel, J. L. N., Nhani Júnior, A., Castroagudín, V. L., Reges, J. T.  
868 de A., Ceresini, P. C., ... Kamoun, S. 2016. Emergence of wheat blast in Bangladesh was  
869 caused by a South American lineage of *Magnaporthe oryzae*. *BMC Biol.* 14:1-11
- 870 Kato, H., Yamamoto, M., Yamaguchi-Ozaki, T., Kadouchi, H., Iwamoto, Y., Nakayashiki, H.,  
871 Tosa, Y., Mayama, S., and Mori, N. 2000. Pathogenicity, mating ability and DNA  
872 Restriction Fragment Length Polymorphisms of *Pyricularia* populations isolated from  
873 gramineae, *Bambusoideae* and *Zingiberaceae* plants. *J. Gen. Plant Pathol.* 66:30–47.
- 874 Klaubauf, S., Tharreau, D., Fournier, E., Groenewald, J. Z., Crous, P. W., de Vries, R. P., and  
875 Lebrun, M.-H. 2014. Resolving the polyphyletic nature of *Pyricularia* (Pyriculariaceae).  
876 *Stud. Mycol.* 79:85–120.
- 877 Latorre, S. M., Reyes-Avila, C. S., Malmgren, A., Win, J., Kamoun, S., and Burbano, H. A.  
878 2020. Differential loss of effector genes in three recently expanded pandemic clonal  
879 lineages of the rice blast fungus. *BMC Biol.* 18:1-15
- 880 Lorenzi, H. 2014. Manual de Identificação e Controle de Plantas Daninhas (7th ed.). Plantarum.  
881 Maciel, J. L. N., Ceresini, P. C., Castroagudín, V. L., Zala, M., Kema, G. H. J., and McDonald,  
882 B. A. 2014. Population structure and pathotype diversity of the wheat blast pathogen  
883 *Magnaporthe oryzae* 25 years after its emergence in Brazil. *Phytopathology* 104:95–107.
- 884 Maciel, J. L. N., Kovaleski, M., Silva, A. N. da, Bonato, A. L. V., and Costa, I. F. D. da. 2023.  
885 Occurrence of *Pyricularia oryzae* Triticum in plants of the genus *Urochloa* in Brazil. *Cienc.*  
886 *Rural* 53:e20210839.



- 887 Malaker, P. K., Barma, N. C. D., Tiwari, T. P., Collis, W. J., Duveiller, E., Singh, P. K., Joshi,  
888 A. K., Singh, R. P., Braun, H.-J., Peterson, G. L., Pedley, K. F., Farman, M. L., and Valent,  
889 B. 2016. First Report of wheat blast caused by *Magnaporthe oryzae* pathotype Triticum in  
890 Bangladesh. *Plant Dis.* 100:2330.
- 891 Murata, N., Aoki, T., Kusaba, M., Tosa, Y., and Chuma, I. 2014. Various species of *Pyricularia*  
892 constitute a robust clade distinct from *Magnaporthe salvinii* and its relatives in  
893 Magnaporthaceae. *Journal of General Plant Pathology* 80:66–72.
- 894 Ou, S. H. 1980. Pathogen variability and host resistance in rice blast disease. *Annu. Rev.*  
895 *Phytopathol.* 18:167–187.
- 896 Pieck, M. L., Ruck, A., Farman, M. L., Peterson, G. L., Stack, J. P., Valent, B., and Pedley, K.  
897 F. 2017. Genomics-based marker discovery and diagnostic assay development for wheat  
898 blast. *Plant Dis.* 101:103–109.
- 899 Rahnama, M., Condon, B., Ascari J. P., Dupuis, J. Del Ponte, E. M., Pedley, K. F., Martinez  
900 S., Valent, B., Farman, M. L. 2021. Recombination of standing variation in a multi-hybrid  
901 swarm drove adaptive radiation in a fungal pathogen and gave rise to two pandemic plant  
902 diseases. bioRxiv 2021.11.24.469688; doi: <https://doi.org/10.1101/2021.11.24.469688>
- 903 Reges, J. T. de A., Jesus, M. N., Silva, S. D. R. da, Souza, M. H., and Rodrigues, J. W. 2019.  
904 Teste de patogenicidade dos isolados de *Pyricularia oryzae* nos hospedeiros de trigo,  
905 cevada, arroz e braquiária. *Rev. Cult. Agron.* 28:19
- 906 Reges, J. T. de A., Negrisoli, M. M., Dorigan, A. F., Castroagudín, V. L., Maciel, J. L. N., and  
907 Ceresini, P. C. 2016. *Pyricularia pennisetigena* and *P. zingibericola* from invasive grasses  
908 infect signal grass, barley and wheat. *Pesq. Agropec. Trop.* 46:206–214. Schneider, C. A.,  
909 Rasband, W. S., and Eliceiri, K. W. 2012. NIH Image to ImageJ: 25 years of image analysis.  
910 *Nat. Methods*, 9:671–675
- 911 Stukenbrock, E. H., and McDonald, B. A. 2008. The origins of plant pathogens in agro-  
912 ecosystems. *Annu. Rev. Phytopathol.* 46:75–100.
- 913 Talbot, N. J., Salch, Y. P., Ma, M., and Hamer, J. E. 1993. Karyotypic variation within clonal  
914 lineages of the rice blast fungus, *Magnaporthe grisea*. *Appl. Environ. Microbiol.* 59:585–  
915 593.
- 916 Tembo, B., Mulenga, R. M., Sichilima, S., M’siska, K. K., Mwale, M., Chikoti, P. C., Singh,  
917 P. K., He, X., Pedley, K. F., Peterson, G. L., Singh, R. P., and Braun, H. J. 2020. Detection  
918 and characterization of fungus (*Magnaporthe oryzae* pathotype Triticum) causing wheat  
919 blast disease on rain-fed grown wheat (*Triticum aestivum* L.) in Zambia. *PloS one*,  
920 15:e0238724
- 921 Tembo, B., Mahmud, N. U., Paul, S. K., Asuke, S., Harant, A., Langner, T., Reyes-Avila, C.  
922 S., Chanclud, E., Were, V., Sichilima, S., Mulenga, R. M., Gupta, D. R., Meheub, M. S.,  
923 Muzahid, A. N. M., Rabby, M. F., Singh, P. K., Bentley, A., Tosa, Y., Croll, D., Kurt, L.,  
924 Islam, T., Talbot, N. J., Kamoun, S., and Win, J. 2021. Multiplex amplicon sequencing  
925 dataset for genotyping pandemic populations of the wheat blast fungus [Data set]. Zenodo.  
926 <https://doi.org/10.5281/zenodo.4605959>
- 927 Thierry, M., Gladieux, P., Fournier, E., Tharreau, D., and Ioos, R. 2020. A Genomic approach  
928 to develop a new qPCR test enabling detection of the *Pyricularia oryzae* lineage causing  
929 wheat blast. *Plant Dis.* 104:60–70.



- 930 Tosa, Y., and Chuma, I. 2014. Classification and parasitic specialization of blast fungi. *J. Gen.*  
931 *Plant Pathol.* 80:202–209.
- 932 Tosa, Y., Hirata, K., Tamba, H., Nakagawa, S., Chuma, I., Isobe, C., Osue, J., Urashima, A.  
933 S., Don, L. D., Kusaba, M., Nakayashiki, H., Tanaka, A., Tani, T., Mori, N., and Mayama,  
934 S. 2004. Genetic constitution and pathogenicity of *Lolium* isolates of *Magnaporthe oryzae*  
935 in comparison with host species-specific pathotypes of the blast fungus. *Phytopathology*  
936 94:454–462.
- 937 Trindade, M., Siqueira, M., Silva, H., and Prabhu, A. 2006. Danos causados por *Magnaporthe*  
938 *grisea* em trigo (Comunicado Técnico Online 202). Online at:  
939 [http://trigo.cnpt.embrapa.br/biblio/co/p\\_co202.htm](http://trigo.cnpt.embrapa.br/biblio/co/p_co202.htm)
- 940 Urashima, A. S., Alves, A. F., Silva, F. N., Oliveira, D., and Gazaffi, R. 2017. Host range,  
941 mating type and population structure of *Magnaporthe* sp. of a single barley field in São  
942 Paulo state. Brazil. *J. Phytopathol.* 165:414–424.
- 943 Urashima, A. S., Igarashi, S., and Kato, H. 1993) Host range, mating type, and fertility of  
944 *Pyricularia grisea* from wheat in Brazil. *Plant Dis.* 77:1211–1216.
- 945 Urashima, A. S., Martins, T. D., Bueno, C. R. N. C., Favaro, D. B., Arruda, M. A., and Mehta,  
946 Y. R. 2004. Triticale and barley: new hosts of *Magnaporthe grisea* in São Paulo, Brazil -  
947 Relationship with blast of rice and wheat. In S. Kawasaki (Ed.), *Rice Blast: Interaction with*  
948 *Rice and Control* (pp. 251–260). Springer Netherlands.
- 949 Valent, B., and Chumley, F. G. 1991. Molecular genetic analysis of the rice blast fungus,  
950 *Magnaporthe grisea*. *Annu. Rev. Phytopathol.* 29:443–467.
- 951 Valent, B., Farman, M., Tosa, Y., Begerow, D., Fournier, E., Gladieux, P., Islam, M. T.,  
952 Kamoun, S., Kemler, M., Kohn, L. M., Lebrun, M.-H., Stajich, J. E., Talbot, N. J., Terauchi,  
953 R., Tharreau, D., and Zhang, N. 2019. *Pyricularia graminis-tritici* is not the correct species  
954 name for the wheat blast fungus: Response to Ceresini et al. (MPP 20:2). *Mol. Plant Pathol.*  
955 20:173–179.
- 956 Xavier Filha, M. S., Rodrigues, F. A., Domiciano, G. P., Oliveira, H. V., Silveira, P. R., and  
957 Moreira, W. R. 2011. Wheat resistance to leaf blast mediated by silicon. *Aust. Plant Pathol.*  
958 40:28–38.
- 959 Yasuhara-Bell, J., Pedley, K. F., Farman, M., Valent, B., and Stack, J. P. 2018. Specific  
960 detection of the wheat blast pathogen (*Magnaporthe oryzae* Triticum) by loop-mediated  
961 isothermal amplification. *Plant Dis.* 102:2550–2559.
- 962 Zadoks, J. C., Chang, T. T., and Konzak, C. F. 1974. A decimal code for the growth stages of  
963 cereals. *Weed Res.* 14:415–421.

964  
965

## Supplementary materials

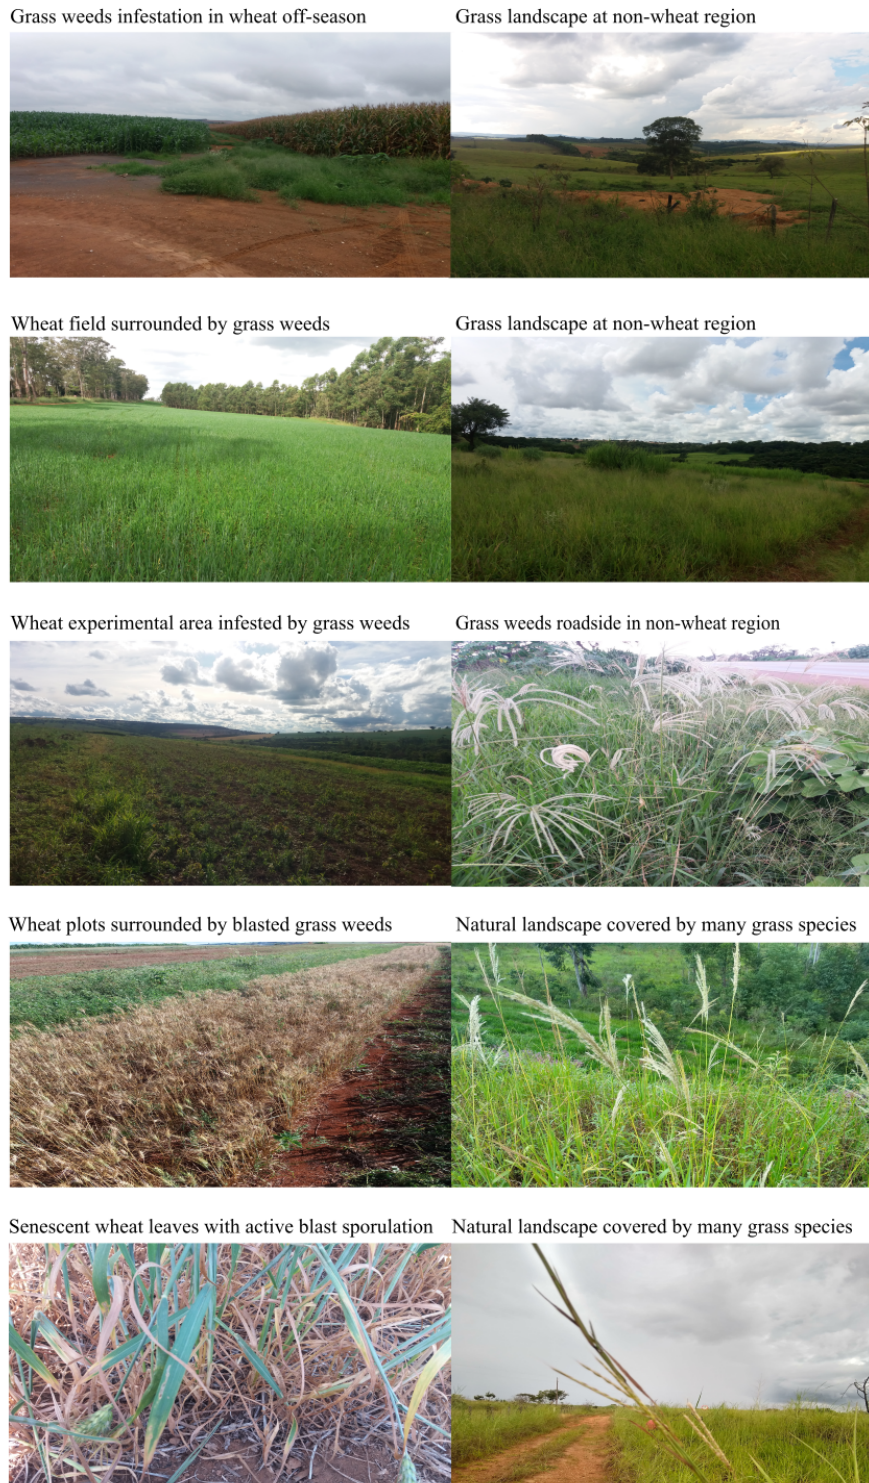

966  
967  
968  
969  
970

**Fig. S1.** Images of the natural landscape and wheat commercial fields where grass weeds and wheat were collected during surveys conducted during the pre-season summer (February) and within-season fall (May) in 2018 and 2019, at Triângulo Mineiro and Centro-Sul de Minas, Brazil.



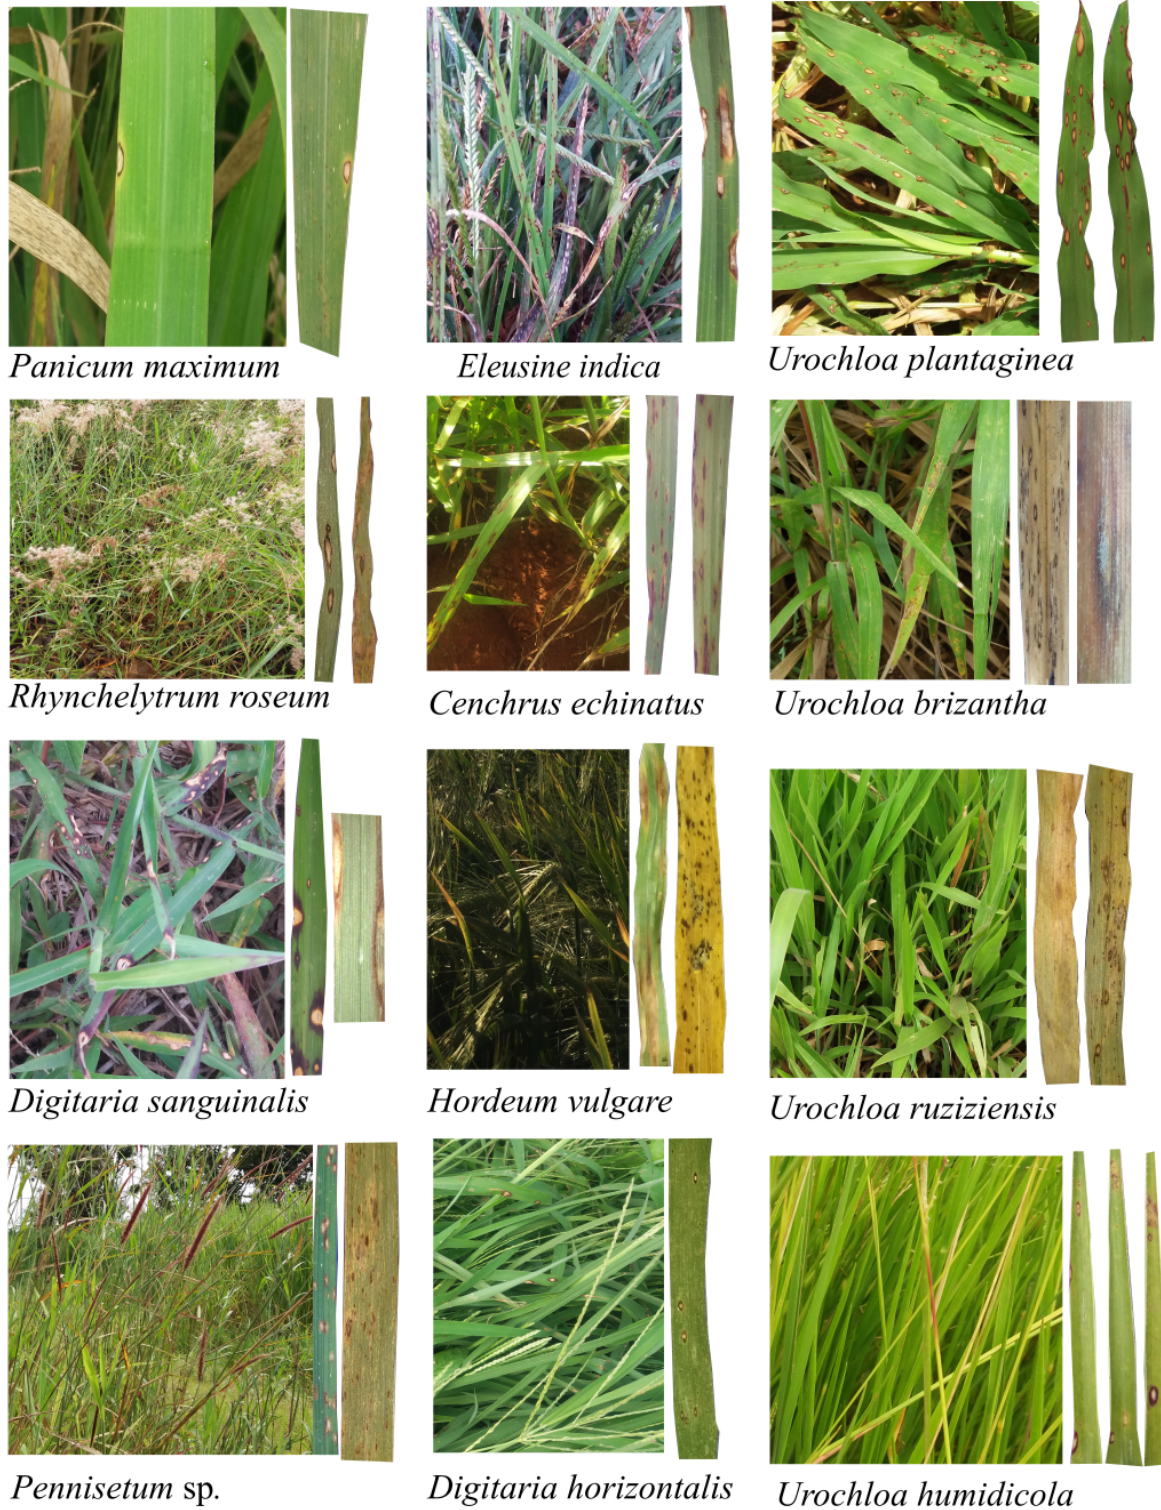

971  
972  
973  
974  
975  
976

**Fig. S2.** Details of symptoms on full plants and leaves of species within Poaceae exhibiting typical blast symptoms. The surveys were conducted twice in 2018 and also 2019, at Triângulo Mineiro and Centro-Sul de MG, Brazil. Plant identification was made at the species level, whenever possible, based on adult specimen morphological characteristics (Crispim and Branco 2002; Lorenzi 2014).
